# Supplementary material for: Bre1/RNF20 promotes Rad51-mediated strand exchange and antagonizes the Srs2/FBH1 helicases
Source: Nat Commun. 2023 May 25;14:3024. doi: 10.1038/s41467-023-38617-z (PMC10213050; doi:10.1038/s41467-023-38617-z)
Supplement: Supplementary file 4 — Supplementary Data 1 [file 41467_2023_38617_MOESM4_ESM.xlsx]

## Sheet: Primers
		Primers
		for ChIP	MATX-F	5'GGTAGGCGAGGACATTATCTATCA3'
			MATX-R	5'GAAGAATACCAGTTTATCTCGCATTCAAATC3'
			MATX-5kb-F	5'CCTGTGATGTGTAATGGAATGGC3'
			MATX-5kb-R	5'CAAGTATCCATTGCCTAAGCCAA3'
		for construct Bre1-pGEX-4t-3 plasmid	Bre1-F	5'ATCGGATCTGGTTCCGCGTGGATCCATGACGGCCGAGCCTGCTAC3'
			Bre1-R	5'TCACGATGCGGCCGCTCGAGTCGACTTACAAGTGCACTGTCAATA3'
		for construct Bre1-1-210-pGEX-4t-3 plasmid	Bre1-(1-210)F	5'ATCGGATCTGGTTCCGCGTGGATCCATGACGGCCGAGCCTGCTAC3'
			Bre1-(1-210)R	5'TCACGATGCGGCCGCTCGAGTCGACTTATTCATTAGATTCTTTTT3'
		for construct Bre1-211-614-pGEX-4t-3 plasmid	Bre1-(211-614)F	5'ATCGGATCTGGTTCCGCGTGGATCCATGAACAATATAAAATCTGG3'
			Bre1-(211-614)R	5'TCACGATGCGGCCGCTCGAGTCGACTTATTTTTCACACTTGGATT3'
		for construct Bre1-615-700-pGEX-4t-3 plasmid	Bre1-(615-700)F	5'ATCGGATCTGGTTCCGCGTGGATCCATGCTACATGATACATTGTT3'
			Bre1-(615-700)R	5'TCACGATGCGGCCGCTCGAGTCGACTTACAAGTGCACTGTCAATA3'
		for construct Bre1-1-465-pGEX-4t-3 plasmid	Bre1-1-465-R	5'TCACGATGCGGCCGCTCGAGCTCAGAGTACTTTTTATGAGTTAAGTC3'
		for construct Bre1-1-475-pGEX-4t-3 plasmid	Bre1-1-475-R	5'TCACGATGCGGCCGCTCGAGCTTGGATATAACAGATTCGTGATT3'
		for construct Bre1-1-496-pGEX-4t-3 plasmid	Bre1-1-496-R	5'TCACGATGCGGCCGCTCGAGTGAATCTTTGGACCTCATCG3'
		for construct Bre1-1-501-pGEX-4t-3 plasmid	Bre1-501-R	5'TCACGATGCGGCCGCTCGAGGATTTCAATTAAAATTGAATCTTTGGA3'
		for construct Bre1-1-504-pGEX-4t-3 plasmid	Bre1-504-R	5'TCACGATGCGGCCGCTCGAGAAGAGTTTTGATTTCAATTAAAATTGA3'
		for construct Bre1-pET30a plasmid	Bre1-F	5'CCATGGCTGATATCGGATCCATGACGGCCGAGCCTGCTAC3'
			Bre1-R	5'TGGTGGTGGTGGTGCTCGAGTTACAAGTGCACTGTCAATA3'
		for construct PEP104-pET30a plasmid	PEP104-F	5'CCATGGCTGATATCGGATCCATGGCTGAAAAATCCAAGACTGAA3'
			PEP104-R	5'TGGTGGTGGTGGTGCTCGAGTTAAAGAGTTTTGATTTCAATTAAAATTGAAT3'
		for construct yRad51-pET30a plasmid	yRad51-F	5'CCATGGCTGATATCGGATCCATGTCTCAAGTTCAAGAAC3'
			yRad51-R	5'TGGTGGTGGTGGTGCTCGAGCTACTCGTCTTCTTCTCTG3'
		for construct Bre1-EK-pET30a plasmid	EK-F	5'AAGATTCAATTTTAATTGCTATCGCTACTCTTTCTAAAAGCCTCAGTAAATCA3'
			EK-R	5'TGATTTACTGAGGCTTTTAGAAAGAGTAGCGATAGCAATTAAAATTGAATCTT3'
		for construct Bre1-DK-pET30a plasmid	DK-F	5'GCTTACCGTAGAAAAAACTAAGGCTGCTCAGGCTTATTTTGCCGCGATGAGGT3'
			DK-R	5'ACCTCATCGCGGCAAAATAAGCCTGAGCAGCCTTAGTTTTTTCTACGGTAAGC3'
		for construct Srs2-pGEX-6p-1 plasmid	Srs2-F	5'TCCAGGGGCCCCTGGGATCCATGTCGTCGAACAATGATC3'
			Srs2-R	5'TCACGATGCGGCCGCTCGAGCTAATCGATGACTATGATTTCACC3'
		for construct yRad51-pGEX-6p-1 plasmid	yRad51-F	5'TCCAGGGGCCCCTGGGATCCATGTCTCAAGTTCAAGAAC3'
			yRad51-R	5'TCACGATGCGGCCGCTCGAGCTACTCGTCTTCTTCTCTG3'
		for construct RNF20-pGEX-6p-1 plasmid	RNF20-F	5'TCCAGGGGCCCCTGGGATCCATGTCAGGAATTGGAAATAAAAGAGCAG3'
			RNF20-R	5'TCACGATGCGGCCGCTCGAGTCAACCAATGTAGATGCGATGAA3'
		for construct RNF20-1-300-pGEX-6p-1 plasmid	RNF20N-R	5'TCACGATGCGGCCGCTCGAGATTCACCCGTTCTAGGACTTCT3'
		for construct hRad51-pET30a plasmid	hRAD51-F	5'CCATGGCTGATATCGGATCCATGGCAATGCAGATGCAGCT3'
			hRAD51-R	5'TGGTGGTGGTGGTGCTCGAGTCAGTCTTTGGCATCTCCCAC3'
		for construct FBH1-pET30a plasmid	FBH1-F	5'CCATGGCTGATATCGGATCCAGGCTGAGGCGTGTGTGC3'
			FBH1-R	5'TGGTGGTGGTGGTGCTCGAGTCAGAAGACGAGGAAGAGCAGG3'
		for construct hRAD51-pGEX-6p-1 plasmid	hRAD51-F	5'TCCAGGGGCCCCTGGGATCCATGGCAATGCAGATGCAGCT3'
			hRAD51-R	5'TCACGATGCGGCCGCTCGAGTCAGTCTTTGGCATCTCCCAC3'

## Sheet: siRNA or shRNA sequences
	siRNA/shRNA	Sequence(5'-3')	Source
	siNC	UUCUCCGAACGUGUCACGUTT	GenePharma
	siRAD51	GACUGCCAGGAUAAAGCUU	GenePharma
	siBRCA2	GAAGAAUGCAGGUUUAAUA	GenePharma
	siRNF20	GUGCUGUAACAUGCGUAAATT	GenePharma
	shRNF20	CGGAGGAACTAGACATTAGAA	sangon

## Sheet: Yeast strains
	Yeast Strains
	Strain name	Parental strain	Genotype	Source
	JKM139		MATa ho hml::ADE1 hmr::ADE1 ade1-100
			leu2-3,112 trp1::hisG lys5 ura3-52 ade3::GAL::HO
	tGI354		MATa-inc arg5,6::MATa-HPH,ade3::GAL::HO hmr::ADE1 hml::ADE1 ura3-52
	ygx022	JKM139	Rad51-3xHA-TRP Bre1-3xFLAG-KanMX	this study
	ygx007	JKM139	Rad52-YFP-KanMX	this study
	ygx008	JKM139	Rad52-YFP-KanMX bre1::TRP	this study
	ygx011	JKM139	Rad51-3xFLAG-KanMX	this study
	ygx012	JKM139	bre1::TRP Rad51-3xFLAG-KanMX	this study
	ygx017	JKM139	bre1::KanMX	this study
	ygx115	JKM139	bre1-EK2A-TRP	this study
	Ydl044	JKM139	Bre1-3xFLAG-KanMX	this study
	ygx116	tGI354	bre1-EK2A-TRP	this study
	ygx117	JKM139	bre1-EK2A-TRP Rad51-3xFLAG-URA	this study
	ygx128	JKM139	FLAG-KanMX-H2B bre1-EK2A-TRP	this study
	ygx130	JKM139	bre1-EK2A-KanMX hta2-htb2::LEU2 htb1-K123R-TRP1	this study
	ygx135	JKM139	Rad51-3xFLAG-URA bre1::KanMX	this study
	yzl097	JKM139	FLAG-KanMX-H2B	this study
	ygx139	JKM139	bre1-EK2A-3xFLAG-KanMX Rad51-3xHA-TRP	this study
	ygx141	JKM139	bre1-EK2A-3xFLAG-KanMX	this study
	ygx181	JKM139	bre1-EK2A-3xFLAG-KanMX	this study
	ygx191	JKM139	Rad52-YFP-KanMX	this study
	ygx204	tGI354	srs2::KanMX	this study
	ygx205	JKM139	srs2::KanMX bre1-EK2A-TRP	this study
	ygx206	tGI354	srs2::KanMX bre1-EK2A-TRP	this study
	ygx207	JKM139	srs2::KanMX	this study
	ygx208	JKM139	srs2::KanMX Rad51-3xFLAG-URA	this study
	ygx209	JKM139	srs2::KanMX bre1-EK2A-TRP Rad51-3xFLAG-URA	this study
	ygx217	tGI354	rad57::KanMX bre1-EK2A-TRP	this study
	ygx218	JKM139	rad57::KanMX bre1-EK2A-TRP	this study
	ygx221	JKM139	rad57::KanMX	this study
	ygx223	JKM139	Srs2-3xFLAG-KanMX bre1-EK2A-TRP	this study
	ygx225	JKM139	bre1-EK2A-TRP Rad52-YFP-HPH	this study
	ygx227	JKM139	bre1::TRP Srs2-3xFLAG-KanMX	this study
	ygx228	JKM139	Srs2-3xFLAG-KanMX	this study
	ygx230	JKM139	srs2::HPH Rad51-3xHA-TRP Bre1-3xFLAG-KanMX	this study
	ygx231	JKM139	Srs2-3xFLAG-KanMX bre1-EK2A-TRP	this study
	ygx239	tGI354	bre1-DK2A-TRP	this study
	ygx240	JKM139	bre1-DK2A-TRP	this study
	ygx241	JKM139	bre1-DK2A-TRP Srs2-3xFLAG-KanMX	this study
	ygx242	tGI354	rad57::KanMX	this study
	ygx243	JKM139	bre1-DK2A-TRP Rad51-3xFLAG-KanMX	this study
	ygx244	JKM139	bre1-DK2A-TRP Srs2-xFLAG-KanMX	this study
	ygx268	tGI354	bre1-EK2A-KanMX bre1-RBD ::TRP1	this study
	ygx269	JKM139	Rad52-YFP-HPH srs2::KanMX	this study
	Yxc797	JKM139	rad52::KanMX	this study
	ygx270	JKM139	Rad52-YFP-HPH srs2::KanMX bre1-EK2A-TRP	this study
	yzjy035	JKM139	rad52-Y376A-KanMX	this study
	yzjy036	JKM139	rad52-Y376A-KanMX bre1-EK2A-TRP	this study
	yzjy038	tGI354	rad52-Y376A-KanMX bre1-EK2A-TRP	this study
	yzjy037	tGI354	rad52-Y376A-KanMX	this study
	yzjy025	JKM139	rad52::KANMX bre1-EK2A-TRP	this study
	yzjy087	tGI354	pRS426	this study
	yzjy089	tGI354	rad52-Y376A-KanMX + pRS426	this study
	yzjy092	tGI354	rad52-Y376A-KanMX + pRS426-Bre1	this study
	yzjy073	tGI354	bre1-EK2A-TRP + pRS426	this study
	yzjy072	tGI354	bre1-EK2A-TRP + pRS426-Rad52	this study
	yzjy101	JKM139	pRS426	this study
	yzjy102	JKM139	bre1-EK2A-TRP+ pRS426	this study
	yzjy103	JKM139	pRS426-Rad52	this study
	yzjy104	JKM139	bre1-EK2A-TRP+ pRS426-Rad52	this study
