# Supplementary material for: Bre1/RNF20 promotes Rad51-mediated strand exchange and antagonizes the Srs2/FBH1 helicases
Source: Nat Commun. 2023 May 25;14:3024. doi: 10.1038/s41467-023-38617-z (PMC10213050; doi:10.1038/s41467-023-38617-z)
Supplement: Supplementary file 5 — Supplementary Data 2 [file 41467_2023_38617_MOESM5_ESM.xlsx]

## Sheet: Sheet1
	Supplementary Data 2--A list of proteins identified in the mass spectrometry study
			Accession	Description	Exp. q-value	Sum PEP Score	Coverage	# Peptides	# PSMs	# Unique Peptides	# Protein Groups	# AAs	MW [kDa]	calc. pI	Found in Sample: [S2] F2: Sample	Found in Sample: [S1] F1: Sample	Modifications	Area:GST	Area:GST-BRE1	emPAI	Score Sequest HT
			P10592	Heat shock protein SSA2 OS=Saccharomyces cerevisiae (strain ATCC 204508 / S288c) OX=559292 GN=SSA2 PE=1 SV=3	0	290.253	75.1174	45	246	11	1	639	69.427	5.06	High	High		2800000000	260000000	253.335	513.399
			G2W8M6	K7_Ssa1p OS=Saccharomyces cerevisiae (strain Kyokai no. 7 / NBRC 101557) OX=721032 GN=K7_SSA1 PE=3 SV=1	0	277.795	68.0685	43	237	6	1	642	69.615	5.11	High	High		600000000	170000000	237.989	502.176
			A6ZQ04	Mitochondrial chaperones OS=Saccharomyces cerevisiae (strain YJM789) OX=307796 GN=SSC1 PE=3 SV=1	0	218.359	53.1202	37	163	37	1	657	70.927	5.59	High	High		3900000000	1100000000	105.605	357.078
			E7QHS1	Pdc1p OS=Saccharomyces cerevisiae (strain Zymaflore VL3) OX=764100 GN=VL3_3143 PE=3 SV=1	0	177.798	48.336	22	85	17	1	631	69.38	7.06	High	High		1100000000	4300000000	44.316	242.277
			E7NI37	Glyceraldehyde-3-phosphate dehydrogenase OS=Saccharomyces cerevisiae (strain FostersO) OX=764101 GN=FOSTERSO_1896 PE=3 SV=1	0	150.066	73.1928	20	91	6	1	332	35.724	6.96	High	High		120000000	1200000000	66.002	226.813
			B3LUH2	Actin OS=Saccharomyces cerevisiae (strain RM11-1a) OX=285006 GN=SCRG_05508 PE=3 SV=1	0	122.709	63.7333	17	58	6	1	375	41.663	5.68	High	High	Acetyl [N-Term]	71000000	320000000	32.246	152.719
			A6ZXQ4	E3 ubiquitin ligase for Rad6p OS=Saccharomyces cerevisiae (strain YJM789) OX=307796 GN=BRE1 PE=4 SV=1	0	117.945	46.5714	29	50	29	1	700	80.57	6.43	Not Found	High			720000000	4.878	131.887
			E7NJC5	Glyceraldehyde-3-phosphate dehydrogenase OS=Saccharomyces cerevisiae (strain FostersO) OX=764101 GN=FOSTERSO_2586 PE=3 SV=1	0	117.792	73.1928	19	87	4	1	332	35.824	6.96	Not Found	High			87000000	43.893	207.208
			P40150	Ribosome-associated molecular chaperone SSB2 OS=Saccharomyces cerevisiae (strain ATCC 204508 / S288c) OX=559292 GN=SSB2 PE=1 SV=2	0	113.093	52.2023	27	68	27	1	613	66.554	5.49	High	High		900000000	730000000	12.111	149.606
			B3LQ77	HSP70 family OS=Saccharomyces cerevisiae (strain RM11-1a) OX=285006 GN=SCRG_03636 PE=3 SV=1	0	101.079	41.2023	33	68	6	1	682	74.422	4.93	High	High		310000000	99000000	9.593	157.621
			C8ZHN0	Adh1p OS=Saccharomyces cerevisiae (strain Lalvin EC1118 / Prise de mousse) OX=643680 GN=EC1118_1O4_0859g PE=3 SV=1	0	100.734	56.0345	17	73	6	1	348	36.828	6.38	High	High		890000000	340000000	32.598	166.172
			G8BNE5	Elongation factor 1-alpha OS=Tetrapisispora phaffii (strain ATCC 24235 / CBS 4417 / NBRC 1672 / NRRL Y-8282 / UCD 70-5) OX=1071381 GN=TPHA0A03470 PE=3 SV=1	0	100.575	37.8556	11	70	1	1	457	49.768	8.95	Not Found	High			22000000	8.183	172.627
			E7NEH1	Pyruvate kinase OS=Saccharomyces cerevisiae (strain FostersO) OX=764101 GN=FOSTERSO_0024 PE=3 SV=1	0	90.9286	58.6614	27	57	24	1	508	55.592	8.25	High	High		770000000	1300000000	11.409	128.864
			G0VJT7	Elongation factor 1-alpha OS=Naumovozyma castellii (strain ATCC 76901 / CBS 4309 / NBRC 1992 / NRRL Y-12630) OX=1064592 GN=NCAS0I01000 PE=3 SV=1	0	88.8356	42.1397	16	78	1	1	458	50.031	9.03	High	High		250000000	22000000	10.938	196.618
			J8LM34	Kar2p OS=Saccharomyces arboricola (strain H-6 / AS 2.3317 / CBS 10644) OX=1160507 GN=SU7_1796 PE=3 SV=1	0	87.7992	35.044	27	58	1	1	682	74.49	4.91	High	Not Found		70000000		6.499	138.326
			W0THY0	Heat shock protein SSA3 OS=Kluyveromyces marxianus DMKU3-1042 OX=1003335 GN=SSA3 PE=3 SV=1	0	83.0576	31.6923	18	84	2	1	650	70.036	5.15	High	Not Found		65000000		3.453	179.7
			Q7Z928	Elongation factor 1-alpha (Fragment) OS=Saccharomyces pastorianus OX=27292 PE=3 SV=1	0	82.4269	43.617	13	59	2	1	376	41.187	8.03	High	High		290000000		10.053	134.99
			A0A1S7HP96	SSA3 (YBL075C) and SSA4 (YER103W) OS=Zygosaccharomyces parabailii OX=1365886 GN=ZPAR0H02250_B PE=3 SV=1	0	74.7276	23.4472	13	83	1	1	644	69.442	5.15	High	High		63000000	9100000	2.065	173.289
			A5E208	Heat shock protein SSA1 OS=Lodderomyces elongisporus (strain ATCC 11503 / CBS 2605 / JCM 1781 / NBRC 1676 / NRRL YB-4239) OX=379508 GN=LELG_03645 PE=3 SV=1	0	73.9641	21.6383	13	84	2	1	647	69.758	5.17	High	Not Found		86000000		3.85	178.974
			G8Y8A5	Piso0_003783 protein OS=Pichia sorbitophila (strain ATCC MYA-4447 / BCRC 22081 / CBS 7064 / NBRC 10061 / NRRL Y-12695) OX=559304 GN=Piso0_003783 PE=3 SV=1	0	73.5571	16.8731	11	74	1	1	646	69.955	5.12	High	Not Found		12000000		3.084	151.859
			A0A250WK05	Hsp70 family chaperone OS=Saccharomyces cerevisiae OX=4932 GN=SSA4 PE=3 SV=1	0	72.0794	27.4143	17	79	1	1	642	69.571	5.14	High	Not Found		14000000		3.354	171.495
			Q7Z8Z8	Elongation factor 1-alpha (Fragment) OS=Vanderwaltozyma yarrowii OX=51620 PE=3 SV=1	0	70.987	38.8298	10	41	1	1	376	41.254	7.77	High	High		600000000	33000000	10.103	93.27
			Q7Z924	Elongation factor 1-alpha (Fragment) OS=Kazachstania transvaalensis OX=36916 PE=3 SV=1	0	66.0984	32.4468	9	33	2	1	376	41.255	7.47	High	High		55000000	440000000	2.675	80.806
			A7A1D2	Translation elongation factor 2 (EF-2) OS=Saccharomyces cerevisiae (strain YJM789) OX=307796 GN=YEF3 PE=4 SV=1	0	64.573	26.7241	20	45	20	1	1044	115.886	6.05	High	High		150000000	390000000	2.367	101.012
			A0A140HDC6	Hsp90 family chaperone OS=Saccharomyces cerevisiae OX=4932 GN=HSC82 PE=3 SV=1	0	62.9116	32.0567	19	41	5	1	705	80.91	4.83	High	High		37000000	300000000	2.7	93.3727
			H0GQW3	Replication protein A subunit OS=Saccharomyces cerevisiae x Saccharomyces kudriavzevii (strain VIN7) OX=1095631 GN=VIN7_5409 PE=3 SV=1	0	62.1741	35.1286	25	1	16	1	661	74.688	7.77	High	High		8400000	100000000	10.055	62.1061
			Q7Z9S4	Actin (Fragment) OS=Nakaseomyces bacillisporus OX=51660 GN=act1 PE=3 SV=1	0	59.3567	58.5284	11	41	1	1	299	33.59	5.68	Not Found	High				17.957	90.4542
			Q7Z917	Elongation factor 1-alpha (Fragment) OS=Kazachstania kunashirensis OX=488016 PE=3 SV=1	0	59.2308	38.1471	9	37	0	1	367	40.112	6.87	Not Found	Not Found				3.329	101.872
			J8LIG6	Adh1p OS=Saccharomyces arboricola (strain H-6 / AS 2.3317 / CBS 10644) OX=1160507 GN=SU7_3127 PE=3 SV=1	0	57.5674	37.931	11	49	1	1	348	36.742	6.68	High	High		400000000	150000000	10.288	120.25
			N1PAX7	Pet9p OS=Saccharomyces cerevisiae (strain CEN.PK113-7D) OX=889517 GN=CENPK1137D_4893 PE=3 SV=1	0	56.9594	45.5975	13	31	13	1	318	34.404	9.79	High	High		220000000	520000000	5.579	77.7801
			Q7Z8X4	Elongation factor 1-alpha (Fragment) OS=Hanseniaspora osmophila OX=56408 PE=3 SV=1	0	55.9881	28.7234	9	36	2	1	376	41.259	8.24	High	High		55000000	440000000	4.337	89.7366
			A0A250WC23	Plasma membrane ATPase OS=Saccharomyces cerevisiae OX=4932 GN=PMA1 PE=3 SV=1	0	55.0934	17.1024	15	23	15	1	918	99.565	5.16	High	High		91000000	54000000	2.07	61.8696
			C7GY10	Vma2p OS=Saccharomyces cerevisiae (strain JAY291) OX=574961 GN=VMA2 PE=3 SV=1	0	52.6261	49.9033	18	34	18	1	517	57.713	5.07	High	High		63000000	220000000	3.437	75.7272
			A6ZKX6	Ribosomal protein L4A OS=Saccharomyces cerevisiae (strain YJM789) OX=307796 GN=RPL4A PE=4 SV=1	0	51.7805	45.8564	12	25	12	1	362	39.068	10.64	High	High		440000000	95000000	4.012	61.773
			A6ZW16	Heat shock protein 90 OS=Saccharomyces cerevisiae (strain YJM789) OX=307796 GN=HSP82 PE=3 SV=1	0	49.6145	25.5289	15	35	1	1	709	81.356	4.91	High	High		12000000	41000000	2.001	80.7092
			A6ZTV6	Aminoimidazole ribotide synthetase OS=Saccharomyces cerevisiae (strain YJM789) OX=307796 GN=ADE5,7 PE=3 SV=1	0	45.152	32.9177	17	19	17	1	802	86.014	5.27	High	High		28000000	170000000	1.703	51.0229
			I2K1X5	Heat shock protein 70 OS=Brettanomyces bruxellensis AWRI1499 OX=1124627 GN=AWRI1499_0839 PE=3 SV=2	0	44.1792	21.4502	11	32	3	1	662	71.57	5.38	High	High		700000000	800000000	1.336	61.2461
			Q87022	Probable RNA-directed RNA polymerase OS=Saccharomyces cerevisiae virus L-A OX=11008 GN=gag-pol PE=3 SV=2	0	44.0098	11.2957	12	22	12	1	1505	170.371	7.59	High	High		350000000	86000000	0.585	50.0573
			C7GQM4	Phosphoglycerate kinase OS=Saccharomyces cerevisiae (strain JAY291) OX=574961 GN=PGK1 PE=3 SV=1	0	40.9368	45.9135	13	21	13	1	416	44.711	7.61	High	High		320000000	93000000	2.162	44.6653
			Q6XAE9	Pyruvate decarboxylase OS=Lachancea kluyveri OX=4934 GN=PDC13 PE=3 SV=1	0	39.964	8.51064	4	23	1	1	564	61.604	5.66	High	Not Found		2600000		2.162	63.9257
			H2S609	Heat shock protein 5 OS=Takifugu rubripes OX=31033 GN=hspa5 PE=3 SV=1	0	39.9606	13.4731	7	31	3	1	668	73.924	5.11	Not Found	High			220000000	1.04	72.602
			W0HEN8	Translational elongation factor EF-1 alpha (Fragment) OS=Hanseniaspora nectarophila OX=1443074 GN=tef1 PE=4 SV=1	0	38.8852	39.8268	4	17	1	1	231	24.969	6.93	High	Not Found		8500000		4.878	46.9794
			R7YY02	Hsp70-like protein OS=Coniosporium apollinis (strain CBS 100218) OX=1168221 GN=W97_06227 PE=3 SV=1	0	37.535	11.0599	7	32	2	1	651	70.478	5.24	High	High		18000000	7800000	0.863	69.825
			E7QJS6	Rps3p OS=Saccharomyces cerevisiae (strain Zymaflore VL3) OX=764100 GN=VL3_4036 PE=3 SV=1	0	37.1999	48.75	11	20	11	1	240	26.486	9.41	High	High		600000000	130000000	5.661	48.7804
			A6ZXS0	GDP-mannose pyrophosphorylase OS=Saccharomyces cerevisiae (strain YJM789) OX=307796 GN=PSA1 PE=4 SV=1	0	37.1116	42.6593	11	18	11	1	361	39.541	6.34	High	High		92000000	640000000	2.325	36.6337
			P00562	Bifunctional aspartokinase/homoserine dehydrogenase 2 OS=Escherichia coli (strain K12) GN=metL PE=1 SV=3	0	35.6837	18.2716	11	14	11	1	810	88.833	5.59	High	High		180000000	110000000	0.798	32.5386
			P08660	Lysine-sensitive aspartokinase 3 OS=Escherichia coli (strain K12) GN=lysC PE=1 SV=2	0	35.4778	21.8263	8	15	8	1	449	48.501	5.11	High	High		190000000	170000000	1.555	36.2098
			C7GN88	Eft1p OS=Saccharomyces cerevisiae (strain JAY291) OX=574961 GN=EFT1 PE=4 SV=1	0	34.2893	18.0523	11	14	11	1	842	93.23	6.32	High	High		130000000	19000000	0.798	30.4266
			A0A0L8RGH3	Glyceraldehyde-3-phosphate dehydrogenase OS=Saccharomyces eubayanus OX=1080349 GN=DI49_2963 PE=3 SV=1	0	33.7943	27.4096	6	40	2	1	332	35.629	8.29	Not Found	High			75000000	1.61	93.6906
			E7QGY9	40S ribosomal protein S4 OS=Saccharomyces cerevisiae (strain Zymaflore VL3) OX=764100 GN=VL3_2749 PE=3 SV=1	0	33.6116	32.852	10	23	10	1	277	31.473	9.99	High	High		310000000	97000000	4.623	57.1834
			A8DNG6	Translation elongation factor 1-alpha (Fragment) OS=Wickerhamomyces mucosus OX=1378264 PE=4 SV=1	0	33.135	33.0986	6	29	1	1	284	30.773	8.31	Not Found	High			12000000	4.412	74.1105
			A0A0L8VMI2	FAS1p Beta subunit of fatty acid synthetase OS=Saccharomyces sp. 'boulardii' OX=252598 GN=KO01_03187 PE=4 SV=1	0	32.9611	7.6548	12	15	12	1	2051	228.532	5.96	High	High		38000000	15000000	0.264	25.5328
			Q7Z907	Elongation factor 1-alpha (Fragment) OS=Kazachstania barnettii OX=61262 PE=3 SV=1	0	32.2336	36.4362	9	27	3	1	376	41.131	7.49	High	High		82000000	8800000	1.721	64.366
			N1NWR9	Ded1p OS=Saccharomyces cerevisiae (strain CEN.PK113-7D) OX=889517 GN=CENPK1137D_2220 PE=3 SV=1	0	31.9488	24.2472	12	15	12	1	631	68.612	8.65	High	High		110000000	37000000	1.198	31.0309
			A0A250WF42	ATP synthase subunit alpha OS=Saccharomyces cerevisiae OX=4932 GN=ATP1 PE=3 SV=1	0	31.4982	25.6881	11	18	10	1	545	58.599	9.04	High	High		29000000	160000000	1.297	42.2606
			A0A1L4AAA8	Rps5p OS=Saccharomyces cariocanus OX=114526 GN=RPS5 PE=3 SV=1	0	31.3463	35.1111	8	15	8	1	225	25.023	8.59	High	High		320000000	130000000	9	33.7036
			A0A250WDA6	Adenyl-nucleotide exchange factor OS=Saccharomyces cerevisiae OX=4932 GN=SSE1 PE=3 SV=1	0	31.2242	23.5209	11	16	11	1	693	77.417	5.16	High	High		190000000	35000000	0.931	34.0183
			A0A0F4XBT6	78 kDa glucose-regulated protein-like protein OS=Hanseniaspora uvarum DSM 2768 OX=1246595 GN=HuKAR2 PE=3 SV=1	0	30.6694	11.3235	8	31	3	1	680	75.155	4.87	High	High		360000000	210000000	0.645	58.5924
			B5VHM3	DNA repair protein RAD51 homolog OS=Saccharomyces cerevisiae (strain AWRI1631) OX=545124 GN=AWRI1631_51620 PE=3 SV=1	0	30.5724	36.75	38	19	11	1	400	42.936	4.92	Not Found	High		7.15728e+07	390000000	5.449	136.697
			A0A250WH26	Acetyl-CoA carboxylase OS=Saccharomyces cerevisiae OX=4932 GN=ACC1 PE=4 SV=1	0	30.0598	10.3896	18	19	18	1	2233	250.198	6.28	High	High		58000000	79000000	0.334	35.7082
			A0A0X8HWL2	HHL010Cp OS=Eremothecium sinecaudum OX=45286 GN=AW171_hschr84814 PE=3 SV=1	0	29.34	14.5985	7	16	3	1	685	74.624	4.94	High	High		160000000	5800000	0.468	33.9828
			A0A0H5FTH5	Uncharacterized protein OS=Leucosporidium scottii OX=5278 GN=ls5930a1_00055 PE=3 SV=1	0	29.0503	36.4431	9	27	2	1	343	38.591	5.44	Not Found	High			82000000	3.642	57.1458
			E7Q4V3	Eno2p OS=Saccharomyces cerevisiae (strain FostersB) OX=764102 GN=FOSTERSB_2197 PE=3 SV=1	0	28.9345	22.8833	7	14	7	1	437	46.885	6	High	High		160000000	22000000	1.395	25.4159
			A0A060SXR3	ARAD1A06666p OS=Blastobotrys adeninivorans OX=409370 GN=GNLVRS02_ARAD1A06666g PE=3 SV=1	0	28.4756	27.2222	9	30	1	1	360	40.123	6.39	High	Not Found		180000000		3.329	56.5874
			E7KNQ7	Pdc6p OS=Saccharomyces cerevisiae (strain Lalvin QA23) OX=764098 GN=QA23_1846 PE=3 SV=1	0	27.6679	11.9005	4	12	1	1	563	61.535	6.19	Not Found	High			90000000	0.711	32.7311
			B3RHE1	Glycogen [starch] synthase OS=Saccharomyces cerevisiae (strain RM11-1a) OX=285006 GN=SCRG_04209 PE=3 SV=1	0	27.1022	23.8298	13	16	12	1	705	80.073	6.29	High	High		140000000	8700000	1.448	29.9791
			J8PZD7	Pdc5p OS=Saccharomyces arboricola (strain H-6 / AS 2.3317 / CBS 10644) OX=1160507 GN=SU7_2214 PE=3 SV=1	0	27.0103	14.3872	4	12	1	1	563	61.836	5.96	High	Not Found		18000000		0.638	30.0834
			C7GVM7	Tef4p OS=Saccharomyces cerevisiae (strain JAY291) OX=574961 GN=TEF4 PE=4 SV=1	0	26.9331	28.8136	8	14	7	1	413	46.612	7.8	High	High		94000000	590000000	1.089	35.5988
			G2WMB0	K7_Rpl25p OS=Saccharomyces cerevisiae (strain Kyokai no. 7 / NBRC 101557) OX=721032 GN=K7_RPL25 PE=3 SV=1	0	26.6424	45.0704	7	14	7	1	142	15.748	10.11	High	High		230000000	80000000	16.783	32.6735
			B5VJT5	60S ribosomal protein L27 OS=Saccharomyces cerevisiae (strain AWRI1631) OX=545124 GN=AWRI1631_80560 PE=3 SV=1	0	26.5591	37.6543	6	10	6	1	162	18.671	10.27	High	High		160000000	27000000	5.31	20.6998
			P04036	4-hydroxy-tetrahydrodipicolinate reductase OS=Escherichia coli (strain K12) GN=dapB PE=1 SV=1	0	26.3599	33.6996	7	19	7	1	273	28.739	5.76	High	High		790000000	66000000	2.793	38.6352
			A0A250WLB0	Ribosomal 60S subunit protein L8A OS=Saccharomyces cerevisiae OX=4932 GN=RPL8A PE=4 SV=1	0	26.2063	39.0625	10	14	2	1	256	28.036	10.08	High	Not Found		17000000		4.08	33.0511
			E7LZL1	Por1p OS=Saccharomyces cerevisiae (strain VIN 13) OX=764099 GN=VIN13_4117 PE=4 SV=1	0	26.196	32.5088	8	9	8	1	283	30.41	8.32	High	High		120000000	21000000	1.976	17.7061
			C7GKD2	Dbp2p OS=Saccharomyces cerevisiae (strain JAY291) OX=574961 GN=DBP2 PE=3 SV=1	0	25.2504	19.3784	9	10	9	1	547	61.004	8.78	High	Not Found		90000000		0.833	18.215
			C4YC34	Uncharacterized protein OS=Clavispora lusitaniae (strain ATCC 42720) OX=306902 GN=CLUG_05851 PE=3 SV=1	0	25.0079	11.5044	7	23	2	1	678	74.106	4.93	High	High	Phospho [T201; T206]	4600000000	3700000000	0.808	52.4619
			N1P2M6	Rpl7bp OS=Saccharomyces cerevisiae (strain CEN.PK113-7D) OX=889517 GN=CENPK1137D_1927 PE=4 SV=1	0	24.6029	33.9921	6	12	6	1	253	28.789	10.24	High	High		280000000	110000000	0.995	31.8383
			B3LL07	Magnesium-activated aldehyde dehydrogenase OS=Saccharomyces cerevisiae (strain RM11-1a) OX=285006 GN=SCRG_02431 PE=3 SV=1	0	24.5489	17.6	8	10	8	1	500	54.376	5.44	High	High		120000000	33000000	0.812	23.3437
			A0A250WMC5	Ribosomal 60S subunit protein L2B OS=Saccharomyces cerevisiae OX=4932 GN=RPL2B PE=4 SV=1	0	24.2969	34.1727	8	12	8	1	278	29.637	10.81	High	High		400000000	78000000	2.652	26.8711
			A0A060T8H6	ARAD1D06732p OS=Blastobotrys adeninivorans OX=409370 GN=GNLVRS02_ARAD1D06732g PE=3 SV=1	0	24.2457	13.1024	8	23	1	1	664	72.56	4.97	High	Not Found		36000000		0.701	49.6402
			A6ZUP8	ATP-dependent 6-phosphofructokinase OS=Saccharomyces cerevisiae (strain YJM789) OX=307796 GN=PFK1 PE=3 SV=1	0	23.9673	10.6383	7	12	7	1	987	107.903	6.39	High	High		12000000	41000000	0.448	25.8587
			A0A0J9X219	Rack1 OS=Lachancea kluyveri OX=4934 PE=1 SV=1	0	23.9152	27.3585	6	10	6	1	318	34.653	6.24	High	High	Acetyl [N-Term]	180000000		1.976	18.0376
			A0A140KF01	Fatty acid synthase subunit alpha OS=Saccharomyces cerevisiae OX=4932 GN=FAS2 PE=3 SV=1	0	23.5048	8.58506	12	12	12	1	1887	206.845	5.44	High	High		35000000	13000000	0.239	20.3045
			A0A0L8RHR8	ATP synthase subunit beta OS=Saccharomyces eubayanus OX=1080349 GN=DI49_3130 PE=3 SV=1	0	23.2597	19.5695	8	13	5	1	511	54.732	5.71	High	High		44000000	75000000	0.995	31.057
			G8JPU4	Uncharacterized protein OS=Eremothecium cymbalariae (strain CBS 270.75 / DBVPG 7215 / KCTC 17166 / NRRL Y-17582) OX=931890 GN=Ecym_2479 PE=3 SV=1	0	23.2578	14.3617	3	11	1	1	564	61.73	5.62	Not Found	High			28000000	0.638	30.4376
			B3LTD0	Ribosomal protein L8B OS=Saccharomyces cerevisiae (strain RM11-1a) OX=285006 GN=SCRG_04947 PE=4 SV=1	0	23.1859	41.7969	10	14	2	1	256	28.094	10.02	High	Not Found		130000000		4.08	27.4221
			B3LQ83	Ribonucleotide reductase subunit OS=Saccharomyces cerevisiae (strain RM11-1a) OX=285006 GN=SCRG_03642 PE=4 SV=1	0	22.9	20.802	7	10	7	1	399	46.104	5.19	High	High		20000000	240000000	1.346	27.151
			P23337	Glycogen [starch] synthase isoform 1 OS=Saccharomyces cerevisiae (strain ATCC 204508 / S288c) OX=559292 GN=GSY1 PE=1 SV=3	0	22.6367	20.4802	11	11	10	1	708	80.46	6.02	High	Not Found		90000000		1.062	17.3452
			A0A0A0WGN4	Glyceraldehyde-3-phosphate dehydrogenase OS=Sugiyamaella lignohabitans OX=796027 GN=TDH3 PE=3 SV=1	0	22.2713	16.9139	4	18	2	1	337	35.806	6.74	Not Found	High			400000000	0.957	46.386
			O13535	Transposon Ty1-H Gag-Pol polyprotein OS=Saccharomyces cerevisiae (strain ATCC 204508 / S288c) OX=559292 GN=TY1B-H PE=3 SV=1	0	22.0412	4.74066	6	11	6	1	1793	202.691	8.32	High	High		73000000	22000000	0.253	27.3606
			J7S7S3	Glyceraldehyde-3-phosphate dehydrogenase OS=Kazachstania naganishii (strain ATCC MYA-139 / BCRC 22969 / CBS 8797 / CCRC 22969 / KCTC 17520 / NBRC 10181 / NCYC 3082) OX=1071383 GN=KNAG0G00880 PE=3 SV=1	0	21.726	20.1807	4	27	1	1	332	35.63	6.8	Not Found	High			10000000	1.015	66.705
			Q6W9G6	Pyruvate decarboxylase OS=Lachancea kluyveri OX=4934 GN=PDC11 PE=3 SV=1	0	21.6876	10.8156	3	11	1	1	564	61.741	5.21	Not Found	High			29000000	0.638	29.0011
			C7GSJ0	Adenosylhomocysteinase OS=Saccharomyces cerevisiae (strain JAY291) OX=574961 GN=SAH1 PE=3 SV=1	0	21.5725	17.1492	7	14	7	1	449	49.094	6.24	High	High		110000000	80000000	1.371	29.0433
			B3RHL1	60S acidic ribosomal protein P0 OS=Saccharomyces cerevisiae (strain RM11-1a) OX=285006 GN=SCRG_04283 PE=3 SV=1	0	21.4318	25.9615	7	11	7	1	312	33.699	4.79	High	High		350000000	300000000	1.254	23.9152
			A0A250WI06	Mitochondrial phosphate carrier OS=Saccharomyces cerevisiae OX=4932 GN=MIR1 PE=3 SV=1	0	21.4083	28.2958	6	10	6	1	311	32.791	9.31	High	High		94000000	90000000	1.154	23.2825
			A0A250WLD5	Chaperone ATPase OS=Saccharomyces cerevisiae OX=4932 GN=HSP104 PE=3 SV=1	0	21.3973	16.7401	12	17	12	1	908	102.012	5.45	High	High		44000000	150000000	0.573	36.9664
			A5DQQ3	Heat shock 70 kd protein cognate 1 OS=Meyerozyma guilliermondii (strain ATCC 6260 / CBS 566 / DSM 6381 / JCM 1539 / NBRC 10279 / NRRL Y-324) OX=294746 GN=PGUG_05604 PE=3 SV=1	0	20.0099	31.2139	4	15	1	1	173	18.997	5.44	High	Not Found		2900000000		4.995	30.7378
			C8Z813	Gus1p OS=Saccharomyces cerevisiae (strain Lalvin EC1118 / Prise de mousse) OX=643680 GN=EC1118_1G1_0232g PE=3 SV=1	0	20.0072	14.9171	9	12	9	1	724	82.553	8.05	High	High		69000000	27000000	0.478	21.4019
			S9VZG3	Heat shock protein S OS=Schizosaccharomyces cryophilus (strain OY26 / ATCC MYA-4695 / CBS 11777 / NBRC 106824 / NRRL Y48691) OX=653667 GN=SPOG_02367 PE=3 SV=1	0	19.997	9.00621	7	32	1	1	644	70.003	5.17	High	Not Found				0.947	70.2479
			H0GH44	YHR020W-like protein OS=Saccharomyces cerevisiae x Saccharomyces kudriavzevii (strain VIN7) OX=1095631 GN=VIN7_2118 PE=3 SV=1	0	19.2817	14.5954	6	10	6	1	692	77.603	6.4	High	High		60000000	56000000	0.455	20.0099
			G8JUX5	Uncharacterized protein OS=Eremothecium cymbalariae (strain CBS 270.75 / DBVPG 7215 / KCTC 17166 / NRRL Y-17582) OX=931890 GN=Ecym_6051 PE=3 SV=1	0	19.1347	37.0629	4	7	1	1	143	15.779	10.32	High	Not Found		73000000		2.162	15.339
			C7GQ83	Rps16ap OS=Saccharomyces cerevisiae (strain JAY291) OX=574961 GN=RPS16A PE=3 SV=1	0	19.1347	36.8056	4	7	1	1	144	15.937	10.26	High	Not Found		73000000		2.162	15.339
			I3Y108	Translation elongation factor 1-alpha (Fragment) OS=Priceomyces haplophilus OX=45502 PE=4 SV=1	0	19.0821	22.5166	3	7	1	1	302	32.62	7.77	Not Found	High			2500000	1.371	16.2259
			E7KBV3	40S ribosomal protein S8 OS=Saccharomyces cerevisiae (strain AWRI796) OX=764097 GN=AWRI796_1381 PE=3 SV=1	0	18.7134	34.5	6	12	6	1	200	22.49	10.74	High	High		300000000	74000000	4.337	25.0565
			B3LH69	Vacuolar ATP synthase catalytic subunit A OS=Saccharomyces cerevisiae (strain RM11-1a) OX=285006 GN=SCRG_00677 PE=3 SV=1	0	18.354	20.4214	9	15	1	1	617	67.681	5.29	Not Found	High			4600000	0.708	32.5223
			G0W3I6	Uncharacterized protein OS=Naumovozyma dairenensis (strain ATCC 10597 / BCRC 20456 / CBS 421 / NBRC 0211 / NRRL Y-12639) OX=1071378 GN=NDAI0A02160 PE=3 SV=1	0	18.3532	35.7798	6	10	1	1	218	25.135	5.96	High	Not Found		16000000		1.683	23.5062
			A6ZXE6	V-ATPase V1 sector subunit A OS=Saccharomyces cerevisiae (strain YJM789) OX=307796 GN=TFP1 PE=4 SV=1	0	18.0909	11.3912	9	15	1	1	1071	118.588	6.1	High	Not Found		12000000		0.371	32.9274
			B3LNK9	Isoleucine-tRNA synthetase OS=Saccharomyces cerevisiae (strain RM11-1a) OX=285006 GN=SCRG_03036 PE=3 SV=1	0	18.0146	7.83582	6	7	6	1	1072	122.92	6.06	Not Found	High			46000000	0.218	18.8313
			N1NXW3	60S ribosomal protein L6 OS=Saccharomyces cerevisiae (strain CEN.PK113-7D) OX=889517 GN=CENPK1137D_379 PE=3 SV=1	0	17.9886	28.4091	4	10	2	1	176	19.949	10.1	High	High		45000000	5700000	2.162	23.5789
			Q7Z8Y2	Elongation factor 1-alpha (Fragment) OS=Zygosaccharomyces lentus OX=85125 PE=3 SV=1	0	17.9495	22.6667	4	8	1	1	375	41.093	7.8	Not Found	High			32000000	0.874	19.2457
			C7GS45	Polyadenylate-binding protein OS=Saccharomyces cerevisiae (strain JAY291) OX=574961 GN=PAB1 PE=3 SV=1	0	17.9006	14.0381	6	6	6	1	577	64.27	5.97	High	Not Found		61000000		0.468	12.0704
			A0A250W9X2	Arf family GTPase OS=Saccharomyces cerevisiae OX=4932 GN=ARF1 PE=3 SV=1	0	17.5616	43.0939	6	10	1	1	181	20.516	7.34	Not Found	High				2.162	23.6407
			B5VPR9	60S ribosomal protein L13 OS=Saccharomyces cerevisiae (strain AWRI1631) OX=545124 GN=AWRI1631_132860 PE=3 SV=1	0	16.781	31.0044	5	11	3	1	229	26.141	10.73	High	High		250000000	110000000	2.455	25.5779
			A9QAD7	Translation elongation factor 1-alpha (Fragment) OS=Candida sp. NRRL YB-1937 OX=473120 PE=4 SV=1	0	16.4887	22.0065	5	21	1	1	309	33.549	7.77	High	Not Found		79000000		1.783	46.5825
			A0A250WBC1	Clathrin heavy chain OS=Saccharomyces cerevisiae OX=4932 GN=CHC1 PE=3 SV=1	0	16.4436	7.50151	9	10	9	1	1653	187.1	5.27	High	High		6100000	45000000	0.179	19.2471
			J6EBL7	Uncharacterized protein OS=Saccharomyces kudriavzevii (strain ATCC MYA-4449 / AS 2.2408 / CBS 8840 / NBRC 1802 / NCYC 2889) OX=226230 GN=SKUD_187305 PE=3 SV=1	0	16.3558	17.7156	6	9	6	1	429	48.651	5.21	High	High		81000000	9300000	1.089	18.1771
			A7A1W7	60S ribosomal protein L6 OS=Saccharomyces cerevisiae (strain YJM789) OX=307796 GN=RPL6B PE=3 SV=1	0	15.9901	22.1591	3	7	1	1	176	19.974	10.08	High	High		120000000	5700000	1.424	15.1007
			B5VIJ6	Ribosomal protein OS=Saccharomyces cerevisiae (strain AWRI1631) OX=545124 GN=AWRI1631_71200 PE=3 SV=1	0	15.9784	31.7972	6	8	6	1	217	24.47	9.72	High	Not Found		260000000		3.125	8.49136
			B5VM12	Phosphoglycerate mutase (Fragment) OS=Saccharomyces cerevisiae (strain AWRI1631) OX=545124 GN=AWRI1631_110760 PE=3 SV=1	0	15.6306	21.7899	5	6	5	1	257	28.726	8.84	High	Not Found		100000000		1.371	14.3065
			A6ZR65	Karyopherin beta 4 OS=Saccharomyces cerevisiae (strain YJM789) OX=307796 GN=KAP123 PE=4 SV=1	0	15.5861	7.90656	6	7	6	1	1113	122.496	4.63	High	High		13000000	88000000	0.302	15.8409
			A0A250WHL6	Bifunctional carbamoylphosphate synthetase/aspartate transcarbamylase OS=Saccharomyces cerevisiae OX=4932 GN=URA2 PE=3 SV=1	0	15.5626	5.19422	9	12	9	1	2214	244.936	5.78	High	High		11000000	45000000	0.14	25.0952
			P0CE47	Elongation factor Tu 1 OS=Escherichia coli (strain K12) GN=tufA PE=1 SV=1	0	15.5423	10.9137	3	6	3	1	394	43.256	5.45	High	High		9600000	40000000	0.425	18.0972
			E7KGY8	60S ribosomal protein L20 OS=Saccharomyces cerevisiae (strain AWRI796) OX=764097 GN=AWRI796_3824 PE=3 SV=1	0	15.3335	22.6316	4	8	4	1	190	22.544	10.08	High	High		590000000	95000000	1.894	16.5318
			E7QBC8	Histone H4 OS=Saccharomyces cerevisiae (strain Zymaflore VL3) OX=764100 GN=VL3_0169 PE=3 SV=1	0	14.657	43.6893	5	8	4	1	103	11.361	11.36	High	Not Found		85000000		9	17.6367
			B3LJB2	Ribosomal protein L3 OS=Saccharomyces cerevisiae (strain RM11-1a) OX=285006 GN=SCRG_01462 PE=3 SV=1	0	14.1674	15.5039	5	10	5	1	387	43.73	10.29	High	High		110000000	54000000	0.778	20.3069
			A0A250WPA0	Alpha-1,4 glucan phosphorylase OS=Saccharomyces cerevisiae OX=4932 GN=GPH1 PE=3 SV=1	0	13.6299	9.64523	7	11	7	1	902	103.211	5.53	High	High		30000000	70000000	0.398	22.36
			P02768	Serum albumin OS=Homo sapiens OX=9606 GN=ALB PE=1 SV=2	0	13.4346	15.7635	9	10	9	1	609	69.321	6.28	High	High		6900000	170000000	0.638	22.3347
			A0A250WKZ2	Hsp70 protein OS=Saccharomyces cerevisiae OX=4932 GN=SSZ1 PE=3 SV=1	0	13.276	15.6415	6	8	6	1	569	61.713	5.14	High	High		32000000	8300000	0.501	16.8062
			P76422	Hydroxymethylpyrimidine/phosphomethylpyrimidine kinase OS=Escherichia coli (strain K12) GN=thiD PE=1 SV=1	0	12.9908	19.9248	3	5	3	1	266	28.616	6.15	High	High		70000000	19000000	0.931	10.722
			J7R812	GTP-binding nuclear protein OS=Kazachstania naganishii (strain ATCC MYA-139 / BCRC 22969 / CBS 8797 / CCRC 22969 / KCTC 17520 / NBRC 10181 / NCYC 3082) OX=1071383 GN=KNAG0F03180 PE=3 SV=1	0	12.7253	21.0884	7	11	7	1	294	33.356	8.41	High	High		110000000	95000000	1.581	25.2463
			A0A0L8RL90	CDC48-like protein OS=Saccharomyces eubayanus OX=1080349 GN=DI49_0946 PE=3 SV=1	0	12.7179	6.2201	4	6	4	1	836	92.033	4.93	High	High		24000000	31000000	0.278	12.5321
			B5VPS1	YMR145Cp-like protein OS=Saccharomyces cerevisiae (strain AWRI1631) OX=545124 GN=AWRI1631_132880 PE=4 SV=1	0	12.5814	11.9643	5	6	5	1	560	62.735	9.28	High	High		35000000	84000000	0.365	13.2171
			C7GVK7	Gfa1p OS=Saccharomyces cerevisiae (strain JAY291) OX=574961 GN=GFA1 PE=4 SV=1	0	12.5418	8.92608	5	8	5	1	717	79.996	6.43	High	High		24000000	28000000	0.315	14.8776
			E7KBN8	Gcd11p OS=Saccharomyces cerevisiae (strain AWRI796) OX=764097 GN=AWRI796_1306 PE=4 SV=1	0	12.4832	20.8647	7	8	7	1	532	58.547	7.21	High	High		48000000	84000000	0.859	10.1079
			Q6BXD8	DEHA2B03872p OS=Debaryomyces hansenii (strain ATCC 36239 / CBS 767 / JCM 1990 / NBRC 0083 / IGC 2968) OX=284592 GN=DEHA2B03872g PE=3 SV=2	0	12.3972	6.87831	2	5	1	1	567	62.416	5.15	Not Found	High			2900000	0.359	11.4573
			E7NH15	Arb1p OS=Saccharomyces cerevisiae (strain FostersO) OX=764101 GN=FOSTERSO_1277 PE=4 SV=1	0	12.3925	9.59119	5	6	5	1	636	71.383	6.67	High	High		11000000	33000000	0.54	12.6926
			B3LHK2	Ribosomal protein L9A OS=Saccharomyces cerevisiae (strain RM11-1a) OX=285006 GN=SCRG_01141 PE=4 SV=1	0	12.2736	23.5602	4	7	4	1	191	21.556	9.73	High	High		410000000	220000000	2.162	12.4628
			A0A0L8RN27	Obg-like ATPase 1 OS=Saccharomyces eubayanus OX=1080349 GN=OLA1 PE=3 SV=1	0	12.2016	11.9289	4	9	4	1	394	44.079	6.58	High	High		110000000	24000000	0.532	16.2085
			P0AEQ1	Protein GlcG OS=Escherichia coli (strain K12) GN=glcG PE=3 SV=1	0	12.0265	15.6716	1	4	1	1	134	13.728	6.06	High	Not Found		48000000		1.683	8.98419
			J6EFV4	40S ribosomal protein S1 OS=Saccharomyces kudriavzevii (strain ATCC MYA-4449 / AS 2.2408 / CBS 8840 / NBRC 1802 / NCYC 2889) OX=226230 GN=YLR441C PE=3 SV=1	0	12.0079	20.2091	5	7	1	1	287	32.436	9.98	High	Not Found		100000000		1.081	12.9548
			A0A1V2LJN2	V-type proton ATPase catalytic subunit A OS=Pichia kudriavzevii OX=4909 GN=BOH78_3736 PE=3 SV=1	0	11.9457	2.79642	4	10	1	1	1788	201.203	6.05	High	High		17000000		0.109	20.7899
			A0A250WIG6	Ribosomal 60S subunit protein L17A OS=Saccharomyces cerevisiae OX=4932 GN=RPL17A PE=3 SV=1	0	11.8583	21.1957	3	9	1	1	184	20.536	11.05	High	High		260000000	19000000	2.981	12.9166
			B3LRK3	Threonine dehydratase OS=Saccharomyces cerevisiae (strain RM11-1a) OX=285006 GN=SCRG_04562 PE=3 SV=1	0	11.8191	14.5833	5	7	5	1	576	63.821	8.53	High	High		24000000	5600000	0.425	12.2391
			I2H827	Glyceraldehyde-3-phosphate dehydrogenase OS=Tetrapisispora blattae (strain ATCC 34711 / CBS 6284 / DSM 70876 / NBRC 10599 / NRRL Y-10934 / UCD 77-7) OX=1071380 GN=TBLA0H02450 PE=3 SV=1	0	11.7111	20.4204	4	25	1	1	333	35.79	7.12	Not Found	High				0.874	54.9139
			Q12672	60S ribosomal protein L21-B OS=Saccharomyces cerevisiae (strain ATCC 204508 / S288c) OX=559292 GN=RPL21B PE=1 SV=1	0	11.5455	42.5	6	7	6	1	160	18.263	10.39	High	High		170000000	210000000	3.642	16.1523
			C7GMN8	40S ribosomal protein S7 OS=Saccharomyces cerevisiae (strain JAY291) OX=574961 GN=RPS7A PE=3 SV=1	0	11.4358	34.0314	5	5	3	1	191	21.708	9.83	High	Not Found		58000000		0.931	10.3437
			V5NW19	Heat shock protein 70 OS=Pyropia yezoensis OX=2788 GN=HSP70 PE=2 SV=1	0	11.4291	8.1448	4	10	1	1	663	71.703	5.06	Not Found	High				0.194	17.3176
			E7KFG5	Rpl10p OS=Saccharomyces cerevisiae (strain AWRI796) OX=764097 GN=AWRI796_3175 PE=4 SV=1	0	11.4074	25.7919	5	7	5	1	221	25.345	10.02	High	High		170000000	150000000	1.154	16.332
			A0A250WEL4	Acetolactate synthase OS=Saccharomyces cerevisiae OX=4932 GN=ILV2 PE=3 SV=1	0	11.3829	13.3916	6	6	6	1	687	74.898	8.76	High	High		3800000	68000000	0.334	13.9125
			A7A077	Phosphoinositide phosphatase OS=Saccharomyces cerevisiae (strain YJM789) OX=307796 GN=SAC1 PE=4 SV=1	0	11.3617	11.7175	5	5	5	1	623	71.08	7.71	High	Not Found		15000000		0.334	4.73222
			A6ZWC1	Ribosomal protein L5 OS=Saccharomyces cerevisiae (strain YJM789) OX=307796 GN=RPL5 PE=3 SV=1	0	10.9764	25.2525	5	7	5	1	297	33.694	6.83	High	High		150000000	130000000	1.069	15.5258
			A7TEG9	Uncharacterized protein OS=Vanderwaltozyma polyspora (strain ATCC 22028 / DSM 70294) OX=436907 GN=Kpol_1036p18 PE=4 SV=1	0	10.9167	8.40909	3	3	3	1	440	49.601	5.07	High	Not Found		45000000		0.304	7.7943
			A0A250WBC8	Positive regulator of the Gcn2p kinase activity OS=Saccharomyces cerevisiae OX=4932 GN=GCN1 PE=4 SV=1	0	10.8601	2.35778	5	5	5	1	2672	296.402	5.26	High	High		64000000	16000000	0.072	9.06195
			C7GIL7	Rpl16bp OS=Saccharomyces cerevisiae (strain JAY291) OX=574961 GN=RPL16B PE=3 SV=1	0	10.8489	21.608	4	6	2	1	199	22.292	10.55	High	High		200000000	35000000	0.719	13.5019
			A0A250WFK9	CTP synthase OS=Saccharomyces cerevisiae OX=4932 GN=URA7 PE=3 SV=1	0	10.7908	7.4266	4	7	4	1	579	64.639	6.01	High	High		21000000	57000000	0.468	10.1263
			A0A250WI19	Carbamoyl-phosphate synthase (Glutamine-hydrolyzing) OS=Saccharomyces cerevisiae OX=4932 GN=CPA2 PE=4 SV=1	0	10.7301	5.45617	4	5	4	1	1118	123.837	5.34	High	High		1300000	24000000	0.215	10.0315
			A0A250WM53	40S ribosomal protein S24 OS=Saccharomyces cerevisiae OX=4932 GN=RPS24B PE=3 SV=1	0	10.6227	31.6901	5	7	5	1	142	16.099	9.99	High	High		85000000	16000000	2.162	10.6535
			B5VMF0	YKR001Cp-like protein OS=Saccharomyces cerevisiae (strain AWRI1631) OX=545124 GN=AWRI1631_112230 PE=3 SV=1	0	10.5918	9.09091	5	6	5	1	704	78.688	7.91	High	High		14000000	24000000	0.271	13.5568
			A0A0L8RGU9	RPL17B-like protein OS=Saccharomyces eubayanus OX=1080349 GN=DI49_2852 PE=3 SV=1	0	10.4359	21.1957	3	7	1	1	184	20.481	11.03	High	Not Found		57000000		2.162	10.1596
			P0A6Y8	Chaperone protein DnaK OS=Escherichia coli (strain K12) GN=dnaK PE=1 SV=2	0	10.4291	4.85893	2	7	1	1	638	69.072	4.97	High	High		700000000	410000000	0.194	13.2713
			P0ABB4	ATP synthase subunit beta OS=Escherichia coli (strain K12) GN=atpD PE=1 SV=2	0	10.2381	9.34783	3	6	3	1	460	50.294	5.01	High	High		180000000	39000000	0.318	11.9957
			A0A0L8RCX6	40S ribosomal protein S1 OS=Saccharomyces eubayanus OX=1080349 GN=RPS1 PE=3 SV=1	0	10.0854	22.7451	5	7	1	1	255	28.825	10.04	High	High		140000000	39000000	1.069	14.0186
			A6ZN26	Eukaryotic translation initiation factor 3 subunit C OS=Saccharomyces cerevisiae (strain YJM789) OX=307796 GN=NIP1 PE=3 SV=1	0	10.0767	4.18719	3	5	3	1	812	93.163	5	High	High		19000000	38000000	0.198	10.2808
			P16862	ATP-dependent 6-phosphofructokinase subunit beta OS=Saccharomyces cerevisiae (strain ATCC 204508 / S288c) OX=559292 GN=PFK2 PE=1 SV=4	0	10.0598	6.56934	4	6	4	1	959	104.552	6.67	High	High		14000000		0.194	8.67347
			A0A0L8RK26	Tubulin beta chain OS=Saccharomyces eubayanus OX=1080349 GN=DI49_1619 PE=3 SV=1	0	10.0235	12.035	5	8	5	1	457	50.879	4.77	High	High		59000000	93000000	1.336	16.5999
			A0A0J9X215	US13 OS=Lachancea kluyveri OX=4934 PE=1 SV=1	0	9.96302	31.7241	4	5	4	1	145	16.896	10.27	High	High	Acetyl [N-Term]	95000000	38000000	1.31	10.2445
			H0GUQ9	Arc1p OS=Saccharomyces cerevisiae x Saccharomyces kudriavzevii (strain VIN7) OX=1095631 GN=VIN7_7079 PE=4 SV=1	0	9.96254	16.9761	4	5	4	1	377	41.964	7.81	High	High		32000000	44000000	0.445	10.6402
			A0A250WF66	Inosine-5'-monophosphate dehydrogenase OS=Saccharomyces cerevisiae OX=4932 GN=IMD4 PE=3 SV=1	0	9.76393	10.8779	4	5	1	1	524	56.312	8.29	High	Not Found		8500000		0.445	8.68373
			C8ZI98	Isocitrate dehydrogenase [NAD] subunit, mitochondrial OS=Saccharomyces cerevisiae (strain Lalvin EC1118 / Prise de mousse) OX=643680 GN=EC1118_1O4_3477g PE=3 SV=1	0	9.69849	13.8211	4	5	4	1	369	39.715	8.69	High	High		27000000	20000000	0.389	7.4817
			C8ZH68	Faa1p OS=Saccharomyces cerevisiae (strain Lalvin EC1118 / Prise de mousse) OX=643680 GN=EC1118_1O4_5578g PE=4 SV=1	0	9.62076	6.85714	4	6	4	1	700	77.817	7.62	High	High		14000000	33000000	0.307	12.7557
			N1P072	V-type proton ATPase subunit C OS=Saccharomyces cerevisiae (strain CEN.PK113-7D) OX=889517 GN=CENPK1137D_923 PE=3 SV=1	0	9.6184	13.7755	3	3	3	1	392	44.161	6.67	Not Found	High			57000000	0.35	9.76844
			C7GW20	Tubulin alpha chain OS=Saccharomyces cerevisiae (strain JAY291) OX=574961 GN=TUB1 PE=3 SV=1	0	9.50078	9.82143	3	5	3	1	448	49.84	5.07	High	High		24000000	57000000	0.52	11.8722
			A6ZUM5	40S ribosomal protein S0-A OS=Saccharomyces cerevisiae (strain YJM789) OX=307796 GN=RPS0A PE=3 SV=1	0	9.49727	16.6667	3	7	3	1	252	28.007	4.72	High	High		310000000	54000000	0.931	12.013
			A0A250WC56	Tryptophan synthase OS=Saccharomyces cerevisiae OX=4932 GN=TRP5 PE=3 SV=1	0	9.35657	7.35502	3	3	3	1	707	76.593	6.43	High	High		34000000	20000000	0.184	7.65507
			C7GUP5	40S ribosomal protein S7 OS=Saccharomyces cerevisiae (strain JAY291) OX=574961 GN=RPS7B PE=3 SV=1	0	9.28003	27.2251	4	5	2	1	191	21.72	9.92	High	High		33000000	19000000	0.585	9.48362
			A6ZUP2	Flavohemoglobin OS=Saccharomyces cerevisiae (strain YJM789) OX=307796 GN=YHB1 PE=1 SV=1	0	9.26009	14.2857	4	6	4	1	399	44.632	6.28	High	High		30000000	75000000	0.551	8.97171
			H0GCE4	Eukaryotic translation initiation factor 3 subunit A OS=Saccharomyces cerevisiae x Saccharomyces kudriavzevii (strain VIN7) OX=1095631 GN=RPG1 PE=3 SV=1	0	9.25127	5.79111	4	4	4	1	967	110.604	6.3	High	High		23000000	23000000	0.136	5.48203
			A6ZUU1	Zuotin OS=Saccharomyces cerevisiae (strain YJM789) OX=307796 GN=ZUO1 PE=4 SV=1	0	9.12163	12.7021	3	3	3	1	433	49.018	7.94	High	Not Found		30000000		0.318	7.1836
			P30870	Glutamate-ammonia-ligase adenylyltransferase OS=Escherichia coli (strain K12) GN=glnE PE=1 SV=2	0	9.11108	4.75687	4	4	4	1	946	108.35	5.2	High	High		36000000	27000000	0.202	9.44901
			Q6TMD7	Glyceraldehyde-3-phosphate dehydrogenase (Fragment) OS=Metschnikowia hawaiiensis OX=27323 GN=G3PD PE=3 SV=1	0	9.10616	22.4359	2	5	1	1	156	16.464	6.27	Not Found	High			140000000	1.512	14.6699
			P0AFZ3	Stringent starvation protein B OS=Escherichia coli (strain K12) GN=sspB PE=1 SV=1	0	8.71994	16.9697	2	3	2	1	165	18.251	4.55	High	Not Found		40000000		1.371	6.58387
			A3M095	Ribosomal protein L15 OS=Scheffersomyces stipitis (strain ATCC 58785 / CBS 6054 / NBRC 10063 / NRRL Y-11545) OX=322104 GN=RPL15A PE=3 SV=1	0	8.55307	18.6275	3	4	3	1	204	24.336	11.6	High	Not Found		82000000		0.778	7.78598
			A6ZKZ9	Conserved protein OS=Saccharomyces cerevisiae (strain YJM789) OX=307796 GN=SCY_0269 PE=4 SV=1	0	8.52036	10.7784	5	6	5	1	501	57.758	6.46	High	High		56000000	37000000	0.417	10.4245
			E7NID7	Rps20p OS=Saccharomyces cerevisiae (strain FostersO) OX=764101 GN=FOSTERSO_2017 PE=3 SV=1	0	8.34197	32.2314	4	4	4	1	121	13.899	9.52	High	Not Found		140000000		1.783	6.48728
			E7KEC8	Cct8p OS=Saccharomyces cerevisiae (strain AWRI796) OX=764097 GN=AWRI796_2623 PE=3 SV=1	0	8.19174	7.78342	4	6	4	1	591	64.458	6.14	High	High		30000000	24000000	0.245	12.6524
			A0A0X8HSR4	40S ribosomal protein S6 OS=Eremothecium sinecaudum OX=45286 GN=AW171_hschr42745 PE=3 SV=1	0	8.15123	20.7627	3	5	3	1	236	26.887	10.4	Not Found	High			44000000	1.031	12.2994
			A6ZMU1	U3 snoRNP protein OS=Saccharomyces cerevisiae (strain YJM789) OX=307796 GN=RRP5 PE=4 SV=1	0	8.09881	3.58589	5	5	5	1	1729	192.904	6.13	High	High		12000000	18000000	0.106	5.2491
			B6K0K8	ATP synthase subunit alpha OS=Schizosaccharomyces japonicus (strain yFS275 / FY16936) OX=402676 GN=SJAG_02564 PE=3 SV=2	0	8.01942	4.65549	2	4	1	1	537	58.605	8.43	High	High		11000000	59000000	0.205	6.9543
			A0A250WK86	Inosine-5'-monophosphate dehydrogenase OS=Saccharomyces cerevisiae OX=4932 GN=IMD3 PE=3 SV=1	0	8.01074	10.7075	4	5	1	1	523	56.549	7.4	High	Not Found		4300000		0.52	8.37036
			C8ZC17	Aminopeptidase OS=Saccharomyces cerevisiae (strain Lalvin EC1118 / Prise de mousse) OX=643680 GN=EC1118_1K5_0694g PE=3 SV=1	0	7.92825	6.61765	4	4	4	1	952	107.717	8.03	Not Found	High			20000000	0.163	7.21366
			M5E4P7	ATP synthase subunit beta OS=Malassezia sympodialis (strain ATCC 42132) OX=1230383 GN=ATP2 PE=3 SV=1	0	7.91193	8.68762	4	5	1	1	541	57.371	5.52	High	High		80000000	13000000	0.417	10.5565
			E7KNI4	Rpl24ap OS=Saccharomyces cerevisiae (strain Lalvin QA23) OX=764098 GN=QA23_1747 PE=4 SV=1	0	7.87725	21.9355	3	4	1	1	155	17.616	11.28	High	Not Found		3400000		2.162	6.54321
			P32352	C-8 sterol isomerase OS=Saccharomyces cerevisiae (strain ATCC 204508 / S288c) OX=559292 GN=ERG2 PE=1 SV=1	0	7.87594	13.964	2	3	2	1	222	24.879	5.91	High	Not Found		30000000		1.683	7.27255
			C7GLX2	Rps11ap OS=Saccharomyces cerevisiae (strain JAY291) OX=574961 GN=RPS11A PE=3 SV=1	0	7.87027	26.7516	4	5	4	1	157	17.837	10.78	High	Not Found		280000000		2.162	8.29745
			A0A250WLU6	Acetyl-coenzyme A synthetase OS=Saccharomyces cerevisiae OX=4932 GN=ACS2 PE=3 SV=1	0	7.86322	11.2738	5	5	5	1	683	75.405	6.71	High	High		18000000	7000000	0.403	11.6243
			G0WBU1	Pyruvate kinase OS=Naumovozyma dairenensis (strain ATCC 10597 / BCRC 20456 / CBS 421 / NBRC 0211 / NRRL Y-12639) OX=1071378 GN=NDAI0E03940 PE=3 SV=1	0	7.83868	10	4	9	1	1	540	59.487	6.48	Not Found	High				0.334	20.531
			V5EWB5	Uncharacterized protein OS=Kalmanozyma brasiliensis (strain GHG001) OX=1365824 GN=PSEUBRA_SCAF1g00334 PE=3 SV=1	0	7.78273	1.34855	1	2	1	1	964	104.579	7.15	High	Not Found		250000000		0.083	5.57765
			G0VEB7	Uncharacterized protein OS=Naumovozyma castellii (strain ATCC 76901 / CBS 4309 / NBRC 1992 / NRRL Y-12630) OX=1064592 GN=NCAS0D03270 PE=3 SV=1	0	7.61241	12.7907	2	2	2	1	258	27.895	10.3	High	Not Found		140000000		0.334	4.77684
			N1P9F0	Ribosomal protein L19 OS=Saccharomyces cerevisiae (strain CEN.PK113-7D) OX=889517 GN=CENPK1137D_4630 PE=3 SV=1	0	7.60719	14.8718	3	6	3	1	195	22.451	11.18	High	High		260000000	270000000	0.874	13.3895
			A0A250WM73	Threonine--tRNA ligase OS=Saccharomyces cerevisiae OX=4932 GN=THS1 PE=3 SV=1	0	7.5732	6.26703	4	4	4	1	734	84.45	6.93	High	High		14000000	60000000	0.216	6.15448
			C7GM20	Rpl28p OS=Saccharomyces cerevisiae (strain JAY291) OX=574961 GN=RPL28 PE=3 SV=1	0	7.56981	16	2	2	2	1	150	16.798	10.62	High	Not Found		79000000		0.778	4.92819
			A0A250WDD6	Translation elongation factor EF1B gamma OS=Saccharomyces cerevisiae OX=4932 GN=CAM1 PE=4 SV=1	0	7.42561	8.19277	3	8	2	1	415	47.085	8.38	High	High		14000000	37000000	0.28	19.6556
			E9P9B1	Rpl16ap OS=Saccharomyces cerevisiae OX=4932 GN=RPL16A PE=3 SV=1	0	7.28773	20	4	5	2	1	200	22.216	10.48	High	High		100000000	33000000	0.719	7.51066
			E7Q1R7	T-complex protein 1 subunit delta OS=Saccharomyces cerevisiae (strain FostersB) OX=764102 GN=FOSTERSB_0617 PE=3 SV=1	0	7.2488	9.07441	3	3	3	1	551	60.555	8.72	High	High		13000000	78000000	0.218	5.07348
			P30748	Molybdopterin synthase sulfur carrier subunit OS=Escherichia coli (strain K12) GN=moaD PE=1 SV=2	0	7.23511	25.9259	1	3	1	1	81	8.752	4.56	High	High		70000000	9000000	1.512	7.17582
			C8Z5U5	Yra1p OS=Saccharomyces cerevisiae (strain Lalvin EC1118 / Prise de mousse) OX=643680 GN=EC1118_1D0_6810g PE=4 SV=1	0	7.18671	18.5841	4	4	4	1	226	24.967	11.33	High	Not Found		61000000		0.778	7.78117
			E7KDC0	Ded81p OS=Saccharomyces cerevisiae (strain AWRI796) OX=764097 GN=AWRI796_2089 PE=4 SV=1	0	7.17462	7.58123	3	4	3	1	554	62.168	5.85	High	High		48000000	37000000	0.233	8.59116
			J4TZD4	Uncharacterized protein OS=Saccharomyces kudriavzevii (strain ATCC MYA-4449 / AS 2.2408 / CBS 8840 / NBRC 1802 / NCYC 2889) OX=226230 GN=SKUD_169004 PE=4 SV=1	0	7.10078	21.118	3	4	1	1	161	18.449	11.08	High	Not Found		30000000		1.783	6.38255
			A0A250WER6	Clustered mitochondria protein homolog OS=Saccharomyces cerevisiae OX=4932 GN=CLU1 PE=3 SV=1	0	7.08051	3.52388	4	4	4	1	1277	145.058	6.39	High	Not Found		8500000		0.124	6.02046
			P62987	Ubiquitin-60S ribosomal protein L40 OS=Homo sapiens OX=9606 GN=UBA52 PE=1 SV=2	0	7.05934	36.7188	4	5	1	1	128	14.719	9.83	High	High		16000000	320000000	1.783	10.8944
			E7LYS0	Eukaryotic translation initiation factor 3 subunit I OS=Saccharomyces cerevisiae (strain VIN 13) OX=764099 GN=TIF34 PE=3 SV=1	0	7.03942	12.1037	3	5	3	1	347	38.731	5.67	High	High		11000000	7500000	0.468	5.61371
			E7LVL0	Cct2p OS=Saccharomyces cerevisiae (strain VIN 13) OX=764099 GN=VIN13_2278 PE=3 SV=1	0	7.03384	6.26186	3	3	3	1	527	57.207	6.11	High	High		19000000	32000000	0.212	6.42906
			A0A0L8RE32	DPS1-like protein OS=Saccharomyces eubayanus OX=1080349 GN=DI49_3512 PE=3 SV=1	0	7.03293	9.33573	4	4	3	1	557	63.435	6.46	High	Not Found		38000000		0.292	4.36863
			A6ZX65	Ubiquinol-cytochrome c oxidoreductase complex subunit OS=Saccharomyces cerevisiae (strain YJM789) OX=307796 GN=QCR2 PE=4 SV=1	0	7.00068	11.413	3	3	3	1	368	40.453	7.96	High	High		16000000	7300000	0.304	5.63447
			E7KLH6	Rps13p OS=Saccharomyces cerevisiae (strain Lalvin QA23) OX=764098 GN=QA23_0799 PE=3 SV=1	0	6.96372	32.1212	4	4	4	1	165	18.765	10.29	High	Not Found		130000000		1.154	8.52769
			A0A250WBA5	Ribosomal 40S subunit protein S15 OS=Saccharomyces cerevisiae OX=4932 GN=RPS15 PE=3 SV=1	0	6.92531	9.15493	1	2	1	1	142	15.992	10.7	High	Not Found		170000000		0.778	6.01309
			E7Q6X6	S-adenosylmethionine synthase OS=Saccharomyces cerevisiae (strain FostersB) OX=764102 GN=FOSTERSB_3213 PE=3 SV=1	0	6.92507	12.3037	3	4	3	1	382	41.803	5.22	High	High		49000000	88000000	0.35	6.8974
			A0A250W9F2	Chaperonin-containing T-complex alpha subunit OS=Saccharomyces cerevisiae OX=4932 GN=TCP1 PE=3 SV=1	0	6.89126	8.05009	4	4	4	1	559	60.457	6.49	High	High		5300000	12000000	0.274	7.04148
			C8Z8Y0	Pil1p OS=Saccharomyces cerevisiae (strain Lalvin EC1118 / Prise de mousse) OX=643680 GN=EC1118_1G1_3972g PE=4 SV=1	0	6.84769	9.14454	3	3	3	1	339	38.268	4.65	High	Not Found		61000000		0.501	6.03791
			A0A250W8U9	Ribosomal 40S subunit protein S17B OS=Saccharomyces cerevisiae OX=4932 GN=RPS17B PE=3 SV=1	0	6.77516	20.122	3	3	3	1	164	18.785	10.78	High	Not Found		39000000		1.371	2.51143
			A0A0L8RLS4	SUB2-like protein OS=Saccharomyces eubayanus OX=1080349 GN=DI49_0984 PE=4 SV=1	0	6.7535	10.3139	3	3	3	1	446	50.292	5.52	High	High		43000000	7400000	0.292	7.21816
			A0A0E9NPU4	Succinate dehydrogenase [ubiquinone] flavoprotein subunit, mitochondrial OS=Saitoella complicata NRRL Y-17804 OX=698492 GN=G7K_5804-t1 PE=3 SV=1	0	6.71663	2.29008	2	2	1	1	1179	130.701	6.76	High	Not Found		6400000		0.06	4.93185
			G0W4V9	Uncharacterized protein OS=Naumovozyma dairenensis (strain ATCC 10597 / BCRC 20456 / CBS 421 / NBRC 0211 / NRRL Y-12639) OX=1071378 GN=NDAI0A06930 PE=3 SV=1	0	6.7131	11.396	2	5	1	1	351	37.121	6.54	Not Found	High			3000000	0.389	11.2242
			P68104	Elongation factor 1-alpha 1 OS=Homo sapiens OX=9606 GN=EEF1A1 PE=1 SV=1	0	6.70045	8.65801	4	9	1	1	462	50.109	9.01	Not Found	High			62000000	0.445	19.9653
			A5E564	60S ribosomal protein L32 (Fragment) OS=Lodderomyces elongisporus (strain ATCC 11503 / CBS 2605 / JCM 1781 / NBRC 1676 / NRRL YB-4239) OX=379508 GN=LELG_04753 PE=4 SV=1	0	6.63209	9.84848	1	2	1	1	132	15.117	10.58	High	Not Found		200000000		1.154	2.94521
			A0A250WDQ4	Ribosomal 60S subunit protein L43A OS=Saccharomyces cerevisiae OX=4932 GN=RPL43A PE=3 SV=1	0	6.53096	25.4717	2	2	2	1	106	11.823	10.11	High	Not Found		24000000		0.778	6.36796
			H6CAK8	Glucose-regulated protein OS=Exophiala dermatitidis (strain ATCC 34100 / CBS 525.76 / NIH/UT8656) OX=858893 GN=HMPREF1120_08142 PE=3 SV=1	0	6.5146	4.69208	3	7	1	1	682	74.647	5.02	High	High		28000000	19000000	0.189	16.1807
			A0A0L8RJB1	6-phosphogluconate dehydrogenase, decarboxylating OS=Saccharomyces eubayanus OX=1080349 GN=DI49_2585 PE=3 SV=1	0	6.38377	4.90798	2	2	2	1	489	53.619	6.86	High	Not Found		25000000		0.145	4.56815
			H2AR04	60S ribosomal protein L13 OS=Kazachstania africana (strain ATCC 22294 / BCRC 22015 / CBS 2517 / CECT 1963 / NBRC 1671 / NRRL Y-8276) OX=1071382 GN=KAFR0B05080 PE=3 SV=1	0	6.29305	13.6564	3	4	1	1	227	25.915	10.65	High	Not Found		7100000		1.154	9.13357
			C5DNK3	KLTH0G17754p OS=Lachancea thermotolerans (strain ATCC 56472 / CBS 6340 / NRRL Y-8284) OX=559295 GN=KLTH0G17754g PE=4 SV=1	0	6.28934	1.94942	3	3	3	1	1898	216.894	7.75	High	Not Found		26000000		0.074	4.60826
			C7GRQ2	Ribonucleoside-diphosphate reductase OS=Saccharomyces cerevisiae (strain JAY291) OX=574961 GN=RNR1 PE=3 SV=1	0	6.18633	3.26577	2	2	2	1	888	99.498	6.19	High	High		24000000	14000000	0.096	5.68825
			E7Q0Y2	Pho88p OS=Saccharomyces cerevisiae (strain FostersB) OX=764102 GN=FOSTERSB_0249 PE=4 SV=1	0	6.14379	14.8936	2	2	2	1	188	21.123	9.19	High	Not Found		12000000		0.389	3.06847
			C7GKE8	Gly1p OS=Saccharomyces cerevisiae (strain JAY291) OX=574961 GN=GLY1 PE=4 SV=1	0	6.14042	10.8527	3	3	3	1	387	42.813	6.4	High	High		14000000	52000000	0.334	6.32806
			P0A6F5	60 kDa chaperonin OS=Escherichia coli (strain K12) GN=groL PE=1 SV=2	0	6.10061	6.0219	3	4	2	1	548	57.293	4.94	High	Not Found		37000000		0.322	5.7561
			E7QCZ8	RuvB-like helicase OS=Saccharomyces cerevisiae (strain Zymaflore VL3) OX=764100 GN=VL3_0914 PE=3 SV=1	0	5.96238	7.88913	3	5	3	1	469	51.178	6.6	High	High		26000000	29000000	0.292	11.5129
			C7GIV9	Rps31p OS=Saccharomyces cerevisiae (strain JAY291) OX=574961 GN=RPS31 PE=4 SV=1	0	5.87775	25.6579	4	4	1	1	152	17.205	9.86	High	Not Found		81000000		1.154	7.34128
			A7A0D2	eIF5B OS=Saccharomyces cerevisiae (strain YJM789) OX=307796 GN=FUN12 PE=4 SV=1	0	5.72476	3.68526	3	3	3	1	1004	112.3	5.71	High	Not Found		7200000		0.093	5.02845
			A0A0L8RPH6	Coatomer subunit beta OS=Saccharomyces eubayanus OX=1080349 GN=DI49_0420 PE=4 SV=1	0	5.6862	7.09147	5	5	5	1	973	108.96	5.48	High	High		28000000	44000000	0.224	6.49082
			B3LQ04	Chaperonin containing T-complex subunit seven component OS=Saccharomyces cerevisiae (strain RM11-1a) OX=285006 GN=SCRG_03560 PE=3 SV=1	0	5.66497	4.90909	2	2	2	1	550	59.714	5.48	Not Found	High			57000000	0.136	5.67935
			H2APT9	Uncharacterized protein OS=Kazachstania africana (strain ATCC 22294 / BCRC 22015 / CBS 2517 / CECT 1963 / NBRC 1671 / NRRL Y-8276) OX=1071382 GN=KAFR0B00910 PE=3 SV=1	0	5.64568	9.76562	4	4	4	1	512	58.491	8.59	High	High		13000000	11000000	0.445	8.60072
			A5DPA0	Uncharacterized protein OS=Meyerozyma guilliermondii (strain ATCC 6260 / CBS 566 / DSM 6381 / JCM 1539 / NBRC 10279 / NRRL Y-324) OX=294746 GN=PGUG_05101 PE=3 SV=2	0	5.63743	4.5977	2	2	2	1	522	58.237	6.77	High	Not Found		13000000		0.172	4.27599
			H0GFN1	Sec4p OS=Saccharomyces cerevisiae x Saccharomyces kudriavzevii (strain VIN7) OX=1095631 GN=VIN7_1515 PE=4 SV=1	0	5.61909	17.2093	3	4	2	1	215	23.514	7.09	High	Not Found		27000000		0.501	8.39516
			A6ZM54	Sterol 24-C-methyltransferase OS=Saccharomyces cerevisiae (strain YJM789) OX=307796 GN=ERG6 PE=3 SV=1	0	5.61649	10.4439	2	2	2	1	383	43.403	5.77	High	Not Found		17000000		0.194	2.43924
			A9QAB3	Translation elongation factor 1-alpha (Fragment) OS=Ogataea trehalophila OX=50267 PE=4 SV=1	0	5.6138	11.7264	2	12	1	1	307	32.971	8.41	High	Not Found				0.413	27.3548
			A0A0L8RM19	Glucose-6-phosphate isomerase OS=Saccharomyces eubayanus OX=1080349 GN=DI49_1221 PE=3 SV=1	0	5.56973	4.15162	2	3	2	1	554	61.098	6.28	High	High		23000000	7500000	0.166	5.95379
			A0A250WDA2	Ribosomal 40S subunit protein S9A OS=Saccharomyces cerevisiae OX=4932 GN=RPS9A PE=4 SV=1	0	5.50128	17.3267	4	4	4	1	202	22.963	9.85	High	Not Found		190000000		0.501	6.59968
			H0GSA0	Lys21p OS=Saccharomyces cerevisiae x Saccharomyces kudriavzevii (strain VIN7) OX=1095631 GN=VIN7_6024 PE=3 SV=1	0	5.44885	10.4545	4	4	4	1	440	48.468	6.71	High	High		18000000	14000000	0.28	8.39424
			A0A0A0P9F0	Translation elongation factor EF1-alpha (Fragment) OS=Fellomyces penicillatus OX=5610 GN=TEF-1 PE=4 SV=1	0	5.44221	10.4651	2	12	1	1	344	37.264	8.06	Not Found	High				0.413	27.3003
			C8ZJ60	V-type proton ATPase subunit H OS=Saccharomyces cerevisiae (strain Lalvin EC1118 / Prise de mousse) OX=643680 GN=EC1118_1P2_3532g PE=3 SV=1	0	5.38685	6.90377	3	3	3	1	478	54.383	6.24	High	Not Found		16000000		0.269	4.12582
			C7GT58	Tsa1p OS=Saccharomyces cerevisiae (strain JAY291) OX=574961 GN=TSA1 PE=4 SV=1	0	5.37214	21.4286	3	4	1	1	196	21.661	5.27	High	Not Found		35000000		0.778	5.21521
			I3Y131	Translation elongation factor 1-alpha (Fragment) OS=Alloascoidea africana OX=27309 PE=4 SV=1	0	5.33497	12.5	2	4	1	1	296	31.886	8.21	High	Not Found		3200000		0.501	7.60489
			B5VE85	Trehalose-6-phosphate synthase (Fragment) OS=Saccharomyces cerevisiae (strain AWRI1631) OX=545124 GN=AWRI1631_22080 PE=3 SV=1	0	5.32634	9.8	3	4	3	1	500	56.776	6.34	High	High		16000000	43000000	0.334	9.69073
			P0A6P9	Enolase OS=Escherichia coli (strain K12) GN=eno PE=1 SV=2	0	5.27278	3.24074	1	1	1	1	432	45.626	5.48	High	Not Found		53000000		0.093	2.54437
			A0A0H5C423	60S ribosomal protein L11 OS=Cyberlindnera jadinii OX=4903 GN=BN1211_2843 PE=3 SV=1	0	5.21881	6.14035	1	2	1	1	228	25.894	8.76	High	Not Found		680000000		0.425	2.51489
			E7QC04	Phosphotransferase OS=Saccharomyces cerevisiae (strain Zymaflore VL3) OX=764100 GN=VL3_0446 PE=3 SV=1	0	5.20045	7.04225	3	3	3	1	568	64.127	6.92	Not Found	High			18000000	0.259	6.92129
			C8ZDC1	Stm1p OS=Saccharomyces cerevisiae (strain Lalvin EC1118 / Prise de mousse) OX=643680 GN=EC1118_1L10_2388g PE=4 SV=1	0	5.17483	6.22711	1	1	1	1	273	29.963	9.66	High	Not Found		3800000		0.155	5.12439
			E7KA08	Histidine biosynthesis trifunctional protein OS=Saccharomyces cerevisiae (strain AWRI796) OX=764097 GN=AWRI796_0461 PE=3 SV=1	0	5.15548	4.35866	3	4	3	1	803	88.087	5.29	Not Found	High			28000000	0.105	8.64316
			J5P5Z1	ILV6-like protein OS=Saccharomyces kudriavzevii (strain ATCC MYA-4449 / AS 2.2408 / CBS 8840 / NBRC 1802 / NCYC 2889) OX=226230 GN=YCL009C PE=4 SV=1	0	5.05465	12.0643	3	3	3	1	373	41.54	7.64	Not Found	High			25000000	0.318	7.51402
			G0V820	Lysine--tRNA ligase OS=Naumovozyma castellii (strain ATCC 76901 / CBS 4309 / NBRC 1992 / NRRL Y-12630) OX=1064592 GN=NCAS0A10600 PE=3 SV=1	0	5.04251	5.47504	3	3	3	1	621	72.065	6.37	High	Not Found		21000000		0.125	6.69883
			P0A8T7	DNA-directed RNA polymerase subunit beta' OS=Escherichia coli (strain K12) GN=rpoC PE=1 SV=1	0	5.03757	2.27434	3	3	3	1	1407	155.063	7.08	High	Not Found		36000000		0.076	7.19032
			Q3V5W6	Glutamine synthetase OS=Pseudomonas taetrolens OX=47884 GN=glnA PE=1 SV=1	0	4.93952	5.98291	2	2	2	1	468	51.734	5.3	High	Not Found		21000000		0.179	1.94686
			C7GN45	Sar1p OS=Saccharomyces cerevisiae (strain JAY291) OX=574961 GN=SAR1 PE=3 SV=1	0	4.93689	13.6126	2	3	2	1	191	21.506	5.38	High	High		23000000	23000000	0.425	8.03353
			P62806	Histone H4 OS=Mus musculus OX=10090 GN=Hist1h4a PE=1 SV=2	0	4.91279	24.2718	2	5	1	1	103	11.36	11.36	Not Found	High			27000000	2.162	8.70656
			A6ZN36	Medium chain alcohol dehydrogenase OS=Saccharomyces cerevisiae (strain YJM789) OX=307796 GN=ADH6 PE=3 SV=1	0	4.82682	8.05556	2	2	2	1	360	39.592	6.74	High	Not Found		12000000		0.259	3.95383
			H0GSQ1	Bmh2p OS=Saccharomyces cerevisiae x Saccharomyces kudriavzevii (strain VIN7) OX=1095631 GN=VIN7_6209 PE=3 SV=1	0	4.78669	8.88889	2	2	2	1	270	30.593	4.88	High	Not Found		15000000		0.292	1.74825
			E7KCT4	Rpl26bp OS=Saccharomyces cerevisiae (strain AWRI796) OX=764097 GN=AWRI796_1811 PE=4 SV=1	0	4.7712	25	3	3	3	1	156	17.76	10.13	High	Not Found		73000000		1.154	8.49906
			A0A0L8RG55	RPS14B-like protein OS=Saccharomyces eubayanus OX=1080349 GN=DI49_2840 PE=3 SV=1	0	4.73196	15.2174	2	4	2	1	138	14.653	10.7	High	High		310000000	280000000	0.668	9.99108
			P0A9B2	Glyceraldehyde-3-phosphate dehydrogenase A OS=Escherichia coli (strain K12) GN=gapA PE=1 SV=2	0	4.72321	6.64653	2	4	1	1	331	35.51	7.11	High	Not Found		17000000		0.334	10.0249
			Q9X603	60 kDa chaperonin OS=secondary endosymbiont of Bemisia tabaci OX=91843 GN=groL PE=3 SV=1	0	4.70509	5.40541	2	3	1	1	555	58.89	5.48	High	High		22000000	93000000	0.218	4.78224
			P61626	Lysozyme C OS=Homo sapiens OX=9606 GN=LYZ PE=1 SV=1	0	4.67965	8.10811	1	4	1	1	148	16.526	9.16	High	High		120000000	1900000000	0.874	7.37967
			A6ZU62	RNA helicase OS=Saccharomyces cerevisiae (strain YJM789) OX=307796 GN=PRP43 PE=4 SV=1	0	4.67488	5.08475	3	3	3	1	767	87.507	6.42	Not Found	High			7400000	0.179	6.28365
			A0A0L8RPM0	NPL3-like protein OS=Saccharomyces eubayanus OX=1080349 GN=DI49_0601 PE=4 SV=1	0	4.66921	6.02679	2	2	2	1	448	48.634	5.66	Not Found	High			13000000	0.212	4.91204
			A0A250WCB5	Cystathionine beta-synthase OS=Saccharomyces cerevisiae OX=4932 GN=CYS4 PE=3 SV=1	0	4.54474	4.53649	2	2	2	1	507	56.017	6.7	High	Not Found		18000000		0.072	3.69738
			P45766	Putative amino-acid ABC transporter-binding protein YhdW OS=Escherichia coli (strain K12) GN=yhdW PE=1 SV=2	0	4.47978	4.10557	1	1	1	1	341	36.996	5.38	High	Not Found		31000000		0.105	2.76661
			A0A250WI95	Bifunctional anthranilate synthase/indole-3-glycerol-phosphate synthase OS=Saccharomyces cerevisiae OX=4932 GN=TRP3 PE=4 SV=1	0	4.44221	4.54545	2	2	2	1	484	53.456	6.92	High	High				0.16	4.012
			P40825	Alanine--tRNA ligase, mitochondrial OS=Saccharomyces cerevisiae (strain ATCC 204508 / S288c) OX=559292 GN=ALA1 PE=1 SV=3	0	4.43973	1.42421	1	1	1	1	983	109.991	5.71	High	Not Found		12000000		0.034	2.61985
			A0A250WJA2	Phosphoglucomutase OS=Saccharomyces cerevisiae OX=4932 GN=PGM1 PE=3 SV=1	0	4.4315	4.21053	2	2	2	1	570	63.058	7.03	High	High		3900000		0.172	4.88977
			N1P334	Scp160p OS=Saccharomyces cerevisiae (strain CEN.PK113-7D) OX=889517 GN=CENPK1137D_1222 PE=4 SV=1	0	4.42938	2.53682	3	3	3	1	1222	134.727	5.85	High	High		23000000	10000000	0.093	6.14056
			A0A0W0D9J2	40S ribosomal protein S22 OS=Candida glabrata OX=5478 GN=AO440_003450 PE=3 SV=1	0	4.37506	29.2308	3	3	3	1	130	14.645	9.99	High	Not Found		50000000		0.995	4.30744
			A8DN70	Translation elongation factor 1-alpha (Fragment) OS=Pichia cactophila OX=53657 PE=4 SV=1	0	4.34762	7.03364	1	2	1	1	327	35.397	8.13	Not Found	High			9700000	0.292	5.26073
			P14618	Pyruvate kinase PKM OS=Homo sapiens OX=9606 GN=PKM PE=1 SV=4	0	4.34525	6.59134	2	2	2	1	531	57.9	7.84	Not Found	High			14000000	0.133	4.25072
			E7KFW6	Kap95p OS=Saccharomyces cerevisiae (strain AWRI796) OX=764097 GN=AWRI796_3395 PE=4 SV=1	0	4.32391	3.13589	2	2	2	1	861	94.688	4.64	Not Found	High			16000000	0.155	4.9605
			B5VN47	YLR109Wp-like protein OS=Saccharomyces cerevisiae (strain AWRI1631) OX=545124 GN=AWRI1631_121600 PE=4 SV=1	0	4.31408	17.6136	2	2	2	1	176	19.103	5.16	High	Not Found		25000000		0.468	1.81805
			C7GPR5	Coatomer subunit beta' OS=Saccharomyces cerevisiae (strain JAY291) OX=574961 GN=SEC27 PE=3 SV=1	0	4.24948	2.58427	2	3	2	1	890	99.456	4.74	High	High		21000000	12000000	0.094	6.74191
			A0A0L8RI21	RPN1-like protein OS=Saccharomyces eubayanus OX=1080349 GN=DI49_2433 PE=4 SV=1	0	4.21843	3.51759	3	3	3	1	995	109.875	4.59	High	High		19000000	5400000	0.126	5.25305
			A0A077CZE7	Elongation factor 1-alpha protein (Fragment) OS=Nakazawaea wyomingensis OX=1538187 PE=4 SV=1	0	4.2159	14.6259	3	6	0	1	294	31.097	5.49	Not Found	High				0.638	13.3114
			A3LQ08	Peroxiredoxin TSA1 OS=Scheffersomyces stipitis (strain ATCC 58785 / CBS 6054 / NBRC 10063 / NRRL Y-11545) OX=322104 GN=TSA1 PE=4 SV=1	0	4.21413	12.6904	2	4	1	1	197	21.761	4.97	Not Found	High			160000000	0.52	7.45588
			A0A0M5MZL5	Translation elongation factor 1-alpha (Fragment) OS=Lipomyces sp. MRA OX=1672963 GN=EF-1a PE=4 SV=1	0	4.17175	9.78593	3	6	1	1	327	35.408	7.99	Not Found	High			6400000	0.438	11.3416
			A0A0H5C830	Uncharacterized protein OS=Cyberlindnera jadinii OX=4903 GN=BN1211_5141 PE=3 SV=1	0	4.1652	9.09091	1	1	1	1	165	17.851	9.67	High	Not Found		91000000		0.259	2.27923
			A0A250WNR2	Single-stranded telomeric DNA-binding/mRNA-binding protein OS=Saccharomyces cerevisiae OX=4932 GN=GBP2 PE=4 SV=1	0	4.15463	4.03071	2	3	2	1	521	59.442	6.06	High	High		23000000	5100000	0.166	4.13423
			A0A0L8R9Q7	PEP4-like protein OS=Saccharomyces eubayanus OX=1080349 GN=DI49_5311 PE=3 SV=1	0	4.11233	4.4335	1	1	1	1	406	44.376	4.81	High	Not Found		22000000		0.122	2.75093
			A0A0L8R9I6	SUI3-like protein OS=Saccharomyces eubayanus OX=1080349 GN=DI49_5231 PE=4 SV=1	0	4.08738	7.36842	2	2	2	1	285	31.505	9.45	High	Not Found		45000000		0.274	4.33052
			A0A0W0E2F6	Peroxiredoxin TSA1 OS=Candida glabrata OX=5478 GN=AO440_003517 PE=4 SV=1	0	4.08454	12.6263	2	2	1	1	198	21.854	5.29	High	Not Found		29000000		0.52	2.48788
			A0A250WJU1	Pyruvate dehydrogenase E1 component subunit alpha OS=Saccharomyces cerevisiae OX=4932 GN=PDA1 PE=4 SV=1	0	4.07982	4.51467	2	2	2	1	443	48.856	8.27	High	High		23000000	24000000	0.15	5.08122
			G8JV50	Ketol-acid reductoisomerase, mitochondrial OS=Eremothecium cymbalariae (strain CBS 270.75 / DBVPG 7215 / KCTC 17166 / NRRL Y-17582) OX=931890 GN=Ecym_6138 PE=3 SV=1	0	4.05141	8.77193	3	3	3	1	399	44.393	9.04	High	High		18000000	35000000	0.304	1.82868
			F2Z614	Succinate dehydrogenase [ubiquinone] flavoprotein subunit, mitochondrial OS=Kluyveromyces lactis (strain ATCC 8585 / CBS 2359 / DSM 70799 / NBRC 1267 / NRRL Y-1140 / WM37) OX=284590 GN=KLLA0_D04444g PE=3 SV=1	0	4.03502	3.84025	2	2	1	1	651	71.296	6.87	High	Not Found		9300000		0.119	2.56263
			A0A250WLA8	Ribose phosphate diphosphokinase subunit OS=Saccharomyces cerevisiae OX=4932 GN=PRS3 PE=4 SV=1	0	4.0044	8.125	2	2	2	1	320	35.102	8.29	High	Not Found		13000000		0.233	4.44782
			A6ZTI6	Conserved protein OS=Saccharomyces cerevisiae (strain YJM789) OX=307796 GN=YCP4 PE=4 SV=1	0	3.92665	6.07287	1	1	1	1	247	26.335	7.39	Not Found	High			53000000	0.145	3.26113
			C8Z756	Aspartokinase OS=Saccharomyces cerevisiae (strain Lalvin EC1118 / Prise de mousse) OX=643680 GN=EC1118_1E8_1607g PE=3 SV=1	0	3.91522	5.31309	2	2	2	1	527	58.033	6.61	Not Found	High			16000000	0.16	5.39306
			G0WDY6	Uncharacterized protein OS=Naumovozyma dairenensis (strain ATCC 10597 / BCRC 20456 / CBS 421 / NBRC 0211 / NRRL Y-12639) OX=1071378 GN=NDAI0G02220 PE=3 SV=2	0	3.89283	5.05415	2	2	2	1	554	60.432	5.94	Not Found	High			22000000	0.16	4.78681
			G0W4Z9	Histone H2B OS=Naumovozyma dairenensis (strain ATCC 10597 / BCRC 20456 / CBS 421 / NBRC 0211 / NRRL Y-12639) OX=1071378 GN=NDAI0A07330 PE=3 SV=1	0	3.85281	16.3522	2	2	2	1	159	17.485	10.23	High	Not Found		5300000		0.311	4.93192
			P0A7V0	30S ribosomal protein S2 OS=Escherichia coli (strain K12) GN=rpsB PE=1 SV=2	0	3.83893	4.14938	1	2	1	1	241	26.727	7.14	High	High		24000000	23000000	0.166	3.11063
			P0AC41	Succinate dehydrogenase flavoprotein subunit OS=Escherichia coli (strain K12) GN=sdhA PE=1 SV=1	0	3.82311	4.2517	2	2	2	1	588	64.381	6.27	High	High		10000000		0.129	4.63841
			E7Q6I3	Serine hydroxymethyltransferase OS=Saccharomyces cerevisiae (strain FostersB) OX=764102 GN=FOSTERSB_3111 PE=3 SV=1	0	3.73794	8.09129	2	2	2	1	482	53.58	8.69	Not Found	High			17000000	0.16	6.23796
			A0A250WCZ8	Ribosomal 60S subunit protein L33A OS=Saccharomyces cerevisiae OX=4932 GN=RPL33A PE=3 SV=1	0	3.71609	23.2759	2	3	2	1	116	13.194	11.44	High	High		87000000	120000000	0.668	5.23352
			A0A1L4A9Y3	Cca1p OS=Saccharomyces cerevisiae OX=4932 GN=CCA1 PE=3 SV=1	0	3.71063	2.9304	1	1	1	1	546	62.474	8.37	Not Found	High			13000000	0.07	2.30044
			A0A0L8RHD3	RHR2-like protein OS=Saccharomyces eubayanus OX=1080349 GN=DI49_2727 PE=4 SV=1	0	3.70797	5.51471	1	1	1	1	272	30.539	6.89	High	Not Found		76000000		0.129	2.69229
			A0A0L8RJW1	YPT1-like protein OS=Saccharomyces eubayanus OX=1080349 GN=DI49_1618 PE=4 SV=1	0	3.59693	8.76494	2	5	1	1	251	28.389	9.01	High	High		62000000		0.259	9.80996
			A7TLD8	Uncharacterized protein OS=Vanderwaltozyma polyspora (strain ATCC 22028 / DSM 70294) OX=436907 GN=Kpol_1020p27 PE=4 SV=1	0	3.57235	12	2	3	2	1	225	25.367	11.08	High	High		160000000		0.334	5.74295
			P38088	Glycine--tRNA ligase 1, mitochondrial OS=Saccharomyces cerevisiae (strain ATCC 204508 / S288c) OX=559292 GN=GRS1 PE=1 SV=3	0	3.56236	5.21739	3	3	3	1	690	78.135	6.52	Not Found	High			35000000	0.101	5.81123
			A6ZWN7	Conserved protein OS=Saccharomyces cerevisiae (strain YJM789) OX=307796 GN=SCY_5714 PE=4 SV=1	0	3.54439	1.05769	1	1	1	1	1040	119.268	5.69	High	Not Found		2500000		0.041	2.26374
			A0A0E9N7Q7	3-isopropylmalate dehydrogenase OS=Saitoella complicata NRRL Y-17804 OX=698492 GN=G7K_0187-t1 PE=3 SV=1	0	3.41896	3.77358	1	1	1	1	371	39.663	5.11	High	Not Found		19000000		0.11	2.86124
			A0A0L8RMC6	RVS161-like protein OS=Saccharomyces eubayanus OX=1080349 GN=DI49_0759 PE=4 SV=1	0	3.40387	12.8302	2	2	2	1	265	30.263	7.24	High	Not Found		11000000		0.245	0
			A0A023T3A9	Sup35p OS=Saccharomyces cerevisiae OX=4932 GN=SUP35 PE=4 SV=1	0	3.38755	3.79562	2	2	2	1	685	76.547	6.96	Not Found	High			26000000	0.129	4.3979
			P0A6H1	ATP-dependent Clp protease ATP-binding subunit ClpX OS=Escherichia coli (strain K12) GN=clpX PE=1 SV=2	0	3.37914	3.06604	1	1	1	1	424	46.327	5.35	High	Not Found		8200000		0.093	2.80035
			P56537	Eukaryotic translation initiation factor 6 OS=Homo sapiens OX=9606 GN=EIF6 PE=1 SV=1	0	3.35962	7.34694	1	1	1	1	245	26.582	4.68	Not Found	High			55000000	0.212	2.91708
			W1QKF3	Aspartate--tRNA ligase, cytoplasmic OS=Ogataea parapolymorpha (strain ATCC 26012 / BCRC 20466 / JCM 22074 / NRRL Y-7560 / DL-1) OX=871575 GN=HPODL_05079 PE=3 SV=1	0	3.3334	5.20646	2	2	1	1	557	62.802	6.32	High	Not Found				0.133	2.10796
			E7K962	Erp1p OS=Saccharomyces cerevisiae (strain AWRI796) OX=764097 GN=AWRI796_0062 PE=3 SV=1	0	3.29734	9.01288	2	2	2	1	233	26.452	8.29	High	Not Found		6100000		0.468	3.68296
			P28070	Proteasome subunit beta type-4 OS=Homo sapiens OX=9606 GN=PSMB4 PE=1 SV=4	0	3.28533	14.0152	2	2	2	1	264	29.185	5.97	Not Found	High			13000000	0.52	4.55496
			B3LGS7	Glycerol-3-phosphate dehydrogenase [NAD(+)] OS=Saccharomyces cerevisiae (strain RM11-1a) OX=285006 GN=SCRG_00527 PE=3 SV=1	0	3.25729	6.88776	2	2	2	1	392	43.34	6.16	High	High		9000000	8000000	0.194	1.80518
			P0A6H5	ATP-dependent protease ATPase subunit HslU OS=Escherichia coli (strain K12) GN=hslU PE=1 SV=1	0	3.2035	2.25734	1	1	1	1	443	49.563	5.35	High	Not Found		4900000		0.08	3.85909
			P45880	Voltage-dependent anion-selective channel protein 2 OS=Homo sapiens OX=9606 GN=VDAC2 PE=1 SV=2	0	3.18697	7.48299	2	2	2	1	294	31.547	7.56	Not Found	High			87000000	0.311	4.14897
			C7GJN7	Rpl31ap OS=Saccharomyces cerevisiae (strain JAY291) OX=574961 GN=RPL31A PE=4 SV=1	0	3.18171	9.64912	1	1	1	1	114	13.044	9.99	High	Not Found		42000000		0.389	2.27292
			A6ZUH0	Nuclear localization sequence binding protein OS=Saccharomyces cerevisiae (strain YJM789) OX=307796 GN=NSR1 PE=4 SV=1	0	3.17098	6.2201	2	2	2	1	418	44.829	4.93	High	Not Found		28000000		0.274	4.74003
			J6EEA5	NOP58-like protein OS=Saccharomyces kudriavzevii (strain ATCC MYA-4449 / AS 2.2408 / CBS 8840 / NBRC 1802 / NCYC 2889) OX=226230 GN=YOR310C PE=4 SV=1	0	3.16771	3.72168	2	2	2	1	618	69.476	9.13	High	High		9200000	4000000	0.133	4.17911
			A0A250WEV0	Long-chain fatty acid-CoA ligase OS=Saccharomyces cerevisiae OX=4932 GN=FAA4 PE=4 SV=1	0	3.15827	3.60231	2	2	2	1	694	77.175	6.73	High	High		24000000	33000000	0.133	1.94306
			A0A250WL18	Aminopeptidase OS=Saccharomyces cerevisiae OX=4932 GN=AAP1 PE=3 SV=1	0	3.14262	3.27103	2	2	2	1	856	97.591	5.24	Not Found	High			21000000	0.084	5.24459
			H0GMB5	Adenylosuccinate synthetase OS=Saccharomyces cerevisiae x Saccharomyces kudriavzevii (strain VIN7) OX=1095631 GN=ADE12 PE=3 SV=1	0	3.0366	10.1617	3	3	3	1	433	48.231	8.53	Not Found	High			16000000	0.28	3.6982
			C5DIX4	KLTH0E15906p OS=Lachancea thermotolerans (strain ATCC 56472 / CBS 6340 / NRRL Y-8284) OX=559295 GN=KLTH0E15906g PE=3 SV=1	0	3.03475	4.65116	1	1	1	1	344	36.432	10.62	Not Found	High				0.105	2.99785
			A6ZRU5	Adenylyl cyclase-associated protein OS=Saccharomyces cerevisiae (strain YJM789) OX=307796 GN=SRV2 PE=3 SV=1	0	3.00991	4.56274	2	2	2	1	526	57.456	5.64	High	High		9600000	11000000	0.166	1.95504
			A0A0L8RHP6	NOP12-like protein OS=Saccharomyces eubayanus OX=1080349 GN=DI49_2361 PE=4 SV=1	0	2.9431	2.92398	1	1	1	1	513	57.895	9.51	High	Not Found		6600000		0.072	0
			A0A0L8RKZ2	RPN11-like protein OS=Saccharomyces eubayanus OX=1080349 GN=DI49_1657 PE=4 SV=1	0	2.90411	7.84314	2	2	2	1	306	34.388	6.01	High	High		12000000	9600000	0.259	2.27461
			D3UF74	Sui2p OS=Saccharomyces cerevisiae (strain Lalvin EC1118 / Prise de mousse) OX=643680 GN=EC1118_1J11_2663g PE=4 SV=1	0	2.87911	7.56579	2	2	2	1	304	34.696	5.02	Not Found	High			29000000	0.116	3.95599
			A0A250WGZ9	Type I HSP40 co-chaperone OS=Saccharomyces cerevisiae OX=4932 GN=YDJ1 PE=3 SV=1	0	2.85439	5.82524	2	2	2	1	412	44.822	6.3	High	Not Found		12000000		0.274	3.58515
			E7KBI7	Dld3p OS=Saccharomyces cerevisiae (strain AWRI796) OX=764097 GN=AWRI796_1222 PE=4 SV=1	0	2.85325	3.22581	1	1	1	1	496	55.206	6.89	High	Not Found		2600000		0.086	2.08157
			A0A0W0EFK4	Protein ARG5,6, mitochondrial OS=Candida glabrata OX=5478 GN=AO440_002916 PE=3 SV=1	0	2.84295	2.86369	2	2	2	1	873	96.381	7.37	Not Found	High			61000000	0.094	2.78703
			A6ZMS9	GMP synthase OS=Saccharomyces cerevisiae (strain YJM789) OX=307796 GN=GUA1 PE=3 SV=1	0	2.83442	5.90476	3	3	3	1	525	58.445	6.49	High	High		23000000	33000000	0.233	3.63149
			A2P2P7	TY2B protein OS=Saccharomyces cerevisiae OX=4932 GN=TY2B PE=4 SV=1	0	2.80799	0.607735	1	1	1	1	1810	206.843	8.51	High	Not Found		13000000		0.022	2.84746
			J7S5U6	Uncharacterized protein OS=Kazachstania naganishii (strain ATCC MYA-139 / BCRC 22969 / CBS 8797 / CCRC 22969 / KCTC 17520 / NBRC 10181 / NCYC 3082) OX=1071383 GN=KNAG0D02650 PE=4 SV=1	0	2.77673	10.4265	2	4	1	1	211	23.094	6.07	High	Not Found		31000000		0.292	8.43674
			A6ZS95	Conserved protein OS=Saccharomyces cerevisiae (strain YJM789) OX=307796 GN=SCY_4806 PE=4 SV=1	0	2.73984	8.41584	2	2	2	1	404	47.063	9.39	Not Found	High			18000000	0.222	4.331
			A3GGV7	Molecular chaperones HSP70/HSC70, HSP70 superfamily Heat-shock protein 70 (HSP72) OS=Scheffersomyces stipitis (strain ATCC 58785 / CBS 6054 / NBRC 10063 / NRRL Y-11545) OX=322104 GN=HSP70.3 PE=3 SV=2	0	2.71965	2.61438	1	1	1	1	612	67.607	8.72	High	Not Found		15000000		0.061	1.69112
			A7TLP7	Uncharacterized protein OS=Vanderwaltozyma polyspora (strain ATCC 22028 / DSM 70294) OX=436907 GN=Kpol_1056p40 PE=4 SV=1	0	2.70769	13.7681	1	3	1	1	138	15.292	11.28	High	Not Found		4800000		0.52	0
			C7GKB3	YNL134C-like protein OS=Saccharomyces cerevisiae (strain JAY291) OX=574961 GN=C1Q_00639 PE=4 SV=1	0	2.64895	6.64894	2	2	2	1	376	41.172	5.88	High	Not Found		5000000		0.259	4.7081
			G8B680	Elongation factor Tu OS=Candida parapsilosis (strain CDC 317 / ATCC MYA-4646) OX=578454 GN=TUF1 PE=3 SV=1	0	2.6466	4.038	1	2	1	1	421	45.999	5.86	High	Not Found		20000000		0.194	0
			C5DFX8	40S ribosomal protein S12 OS=Lachancea thermotolerans (strain ATCC 56472 / CBS 6340 / NRRL Y-8284) OX=559295 GN=KLTH0D00792g PE=3 SV=1	0	2.62511	14.4828	2	2	2	1	145	15.84	4.7	High	Not Found		14000000		0.778	3.47021
			C7GT18	Rnr4p OS=Saccharomyces cerevisiae (strain JAY291) OX=574961 GN=RNR4 PE=4 SV=1	0	2.62306	3.47826	1	1	1	1	345	40.059	5.21	Not Found	High			16000000	0.083	1.90571
			A0A1A7MN26	Uncharacterized protein OS=Aureobasidium pullulans OX=5580 GN=AUREO_025960 PE=4 SV=1	0	2.58336	3.42857	1	1	1	1	350	38.602	5.29	High	Not Found		30000000		0.11	2.70687
			B5VGB9	Reticulon-like protein OS=Saccharomyces cerevisiae (strain AWRI1631) OX=545124 GN=AWRI1631_44520 PE=4 SV=1	0	2.56543	2.9316	1	1	1	1	307	34.424	9.17	High	Not Found		7900000		0.11	2.08385
			J7RWZ3	Uncharacterized protein OS=Kazachstania naganishii (strain ATCC MYA-139 / BCRC 22969 / CBS 8797 / CCRC 22969 / KCTC 17520 / NBRC 10181 / NCYC 3082) OX=1071383 GN=KNAG0C04500 PE=3 SV=1	0	2.53358	0.771704	1	1	1	1	1555	175.316	6.96	Not Found	High			2400000	0.029	2.3095
			A0A250WFH5	NADH-ubiquinone reductase (H(+)-translocating) OS=Saccharomyces cerevisiae OX=4932 GN=NDI1 PE=4 SV=1	0	2.52071	2.92398	1	1	1	1	513	57.242	9.44	Not Found	High			23000000	0.083	2.35376
			A0A0L8RD00	Acetyltransferase component of pyruvate dehydrogenase complex OS=Saccharomyces eubayanus OX=1080349 GN=DI49_4660 PE=3 SV=1	0	2.51485	3.3195	1	1	1	1	482	51.585	8.37	High	Not Found		33000000		0.077	1.73644
			C4YHF4	Tyrosine--tRNA ligase OS=Candida albicans (strain WO-1) OX=294748 GN=CAWG_03500 PE=3 SV=1	0	2.5106	2.68949	1	1	1	1	409	44.958	7.03	High	Not Found		3900000		0.077	2.26135
			P07639	3-dehydroquinate synthase OS=Escherichia coli (strain K12) GN=aroB PE=1 SV=1	0	2.48692	3.03867	1	2	1	1	362	38.856	6.05	High	High		450000000	360000000	0.116	4.90936
			R7Z692	Uncharacterized protein OS=Coniosporium apollinis (strain CBS 100218) OX=1168221 GN=W97_08868 PE=3 SV=1	0	2.4828	1.44357	1	1	1	1	762	82.757	5.58	High	Not Found		13000000		0.054	2.0074
			H0GK67	Erg27p OS=Saccharomyces cerevisiae x Saccharomyces kudriavzevii (strain VIN7) OX=1095631 GN=VIN7_3249 PE=4 SV=1	0	2.47743	4.35967	1	1	1	1	367	42.136	8.68	Not Found	High			5600000	0.093	2.12312
			W3VGC2	Uncharacterized protein OS=Pseudozyma aphidis (strain ATCC 32657 / CBS 517.83 / DSM 70725 / JCM 10318 / NBRC 10182 / NRRL Y-7954 / St-0401) OX=1391700 GN=PaG_05479 PE=4 SV=1	0	2.4754	0.994575	1	2	1	1	1106	123.14	5.63	High	Not Found		25000000		0.077	4.05217
			A0A0L8RHL8	NPA3-like protein OS=Saccharomyces eubayanus OX=1080349 GN=DI49_3084 PE=4 SV=1	0	2.45259	3.59897	1	1	1	1	389	43.575	4.75	Not Found	High			15000000	0.129	2.09745
			I2GV71	RuvB-like helicase OS=Tetrapisispora blattae (strain ATCC 34711 / CBS 6284 / DSM 70876 / NBRC 10599 / NRRL Y-10934 / UCD 77-7) OX=1071380 GN=TBLA0A02230 PE=3 SV=1	0	2.40738	4.63158	2	4	2	1	475	51.859	5.31	High	High		4600000	48000000	0.172	8.26753
			P10619	Lysosomal protective protein OS=Homo sapiens OX=9606 GN=CTSA PE=1 SV=2	0	2.39062	2.70833	1	1	1	1	480	54.431	6.61	Not Found	High				0.11	2.32644
			B5VK61	YHR128Wp-like protein OS=Saccharomyces cerevisiae (strain AWRI1631) OX=545124 GN=AWRI1631_81830 PE=4 SV=1	0	2.32523	5.57769	1	1	1	1	251	28.73	7.69	Not Found	High				0.136	2.02015
			G0V905	Uncharacterized protein OS=Naumovozyma castellii (strain ATCC 76901 / CBS 4309 / NBRC 1992 / NRRL Y-12630) OX=1064592 GN=NCAS0A13960 PE=4 SV=1	0	2.31016	2.46637	1	1	1	1	446	51.901	5.54	High	Not Found		19000000		0.086	1.65281
			A5DS53	Homoisocitrate dehydrogenase, mitochondrial OS=Lodderomyces elongisporus (strain ATCC 11503 / CBS 2605 / JCM 1781 / NBRC 1676 / NRRL YB-4239) OX=379508 GN=LELG_00189 PE=4 SV=1	0	2.30036	6.36605	2	2	2	1	377	40.886	6.01	High	High		3900000	4100000	0.212	4.15862
			G8BMX2	Uncharacterized protein OS=Tetrapisispora phaffii (strain ATCC 24235 / CBS 4417 / NBRC 1672 / NRRL Y-8282 / UCD 70-5) OX=1071381 GN=TPHA0A01670 PE=4 SV=1	0	2.29508	2.01863	1	2	1	1	644	71.571	5.24	High	High		5900000	28000000	0.061	3.07387
			A0A1Z8JS13	Fimbrin OS=Pichia kudriavzevii OX=4909 GN=CAS74_001715 PE=4 SV=1	0	2.29508	0.608899	1	2	1	1	2135	241.551	6.21	High	High		5900000	28000000	0.017	3.07387
			I2H2R3	Transcription elongation factor SPT5 OS=Tetrapisispora blattae (strain ATCC 34711 / CBS 6284 / DSM 70876 / NBRC 10599 / NRRL Y-10934 / UCD 77-7) OX=1071380 GN=TBLA0D01570 PE=3 SV=1	0	2.27442	0.93633	1	1	1	1	1068	116.853	5.29	High	Not Found		32000000		0.037	2.09161
			A6ZXW6	Trehalase OS=Saccharomyces cerevisiae (strain YJM789) OX=307796 GN=NTH1 PE=3 SV=1	0	2.26584	1.59787	1	1	1	1	751	85.859	7.77	High	Not Found		1800000		0.046	1.8353
			A0A061AP53	RHTO0S04e04654g1_1 OS=Rhodosporidium toruloides OX=5286 GN=RHTO0S_04e04654g PE=4 SV=1	0	2.25995	2.67559	1	1	1	1	598	62.596	8.81	Not Found	High			19000000	0.07	0
			E7QKB3	Rps19ap OS=Saccharomyces cerevisiae (strain Zymaflore VL3) OX=764100 GN=VL3_4278 PE=4 SV=1	0	2.25995	5.4878	1	1	1	1	164	18.6	9.28	High	Not Found		35000000		0.179	2.26891
			A0A0L8RBH3	PRO2-like protein OS=Saccharomyces eubayanus OX=1080349 GN=DI49_5140 PE=3 SV=1	0	2.22937	3.3543	1	2	1	1	477	52.019	6.34	Not Found	High			7600000	0.068	2.59933
			A0A1E5RJY0	ADP-ribosylation factor OS=Hanseniaspora uvarum OX=29833 GN=AWRI3580_g2880 PE=3 SV=1	0	2.20656	7.73481	1	1	1	1	181	20.386	7.34	Not Found	High				0.212	3.22557
			P40307	Proteasome subunit beta type-2 OS=Rattus norvegicus OX=10116 GN=Psmb2 PE=1 SV=1	0	2.20128	7.46269	1	1	1	1	201	22.898	7.44	Not Found	High			8400000	0.194	2.54067
			J4U2B1	DBP5-like protein OS=Saccharomyces kudriavzevii (strain ATCC MYA-4449 / AS 2.2408 / CBS 8840 / NBRC 1802 / NCYC 2889) OX=226230 GN=YOR046C PE=3 SV=1	0	2.18729	2.3766	1	2	1	1	547	61.012	8.29	High	High		6800000	28000000	0.07	4.87165
			A0A0E9N9Q4	Uncharacterized protein OS=Saitoella complicata NRRL Y-17804 OX=698492 GN=G7K_0379-t1 PE=4 SV=1	0	2.18131	1.17574	1	1	1	1	1616	177.74	7.59	High	Not Found		32000000		0.027	2.15342
			B5VT10	YPL160Wp-like protein OS=Saccharomyces cerevisiae (strain AWRI1631) OX=545124 GN=AWRI1631_161070 PE=4 SV=1	0	2.15483	2.47706	2	2	2	1	1090	124.118	5.9	High	High		9000000		0.071	1.93019
			P0A7R9	30S ribosomal protein S11 OS=Escherichia coli (strain K12) GN=rpsK PE=1 SV=2	0	2.15311	9.30233	1	1	1	1	129	13.836	11.33	Not Found	High			17000000	0.334	2.38006
			C7GRZ5	Erg20p OS=Saccharomyces cerevisiae (strain JAY291) OX=574961 GN=ERG20 PE=3 SV=1	0	2.14212	3.97727	1	1	1	1	352	40.458	5.47	High	Not Found		10000000		0.116	2.14494
			P0A8V2	DNA-directed RNA polymerase subunit beta OS=Escherichia coli (strain K12) GN=rpoB PE=1 SV=1	0	2.12563	1.63934	2	2	2	1	1342	150.538	5.26	High	Not Found		21000000		0.057	3.53128
			A0A1Z8JK23	ADP-ribosylation factor-like protein 1 OS=Pichia kudriavzevii OX=4909 GN=CAS74_003921 PE=3 SV=1	0	2.1243	1.38539	1	1	1	1	794	90.763	7.96	High	Not Found		39000000		0.048	2.02422
			P37330	Malate synthase G OS=Escherichia coli (strain K12) GN=glcB PE=1 SV=3	0	2.12085	1.38313	1	1	1	1	723	80.438	6.18	High	Not Found		43000000		0.059	2.18312
			H0H287	Rrp12p OS=Saccharomyces cerevisiae x Saccharomyces kudriavzevii (strain VIN7) OX=1095631 GN=VIN7_10436 PE=4 SV=1	0	2.1088	0.976404	1	1	1	1	1229	136.865	7.59	Not Found	High				0.036	2.27853
			A0A0L8RDZ2	Uncharacterized protein OS=Saccharomyces eubayanus OX=1080349 GN=DI49_4403 PE=4 SV=1	0	2.08024	4.01146	1	1	1	1	349	37.933	7.06	Not Found	High				0.122	3.01812
			Q6BKV1	DEHA2F18986p OS=Debaryomyces hansenii (strain ATCC 36239 / CBS 767 / JCM 1990 / NBRC 0083 / IGC 2968) OX=284592 GN=DEHA2F18986g PE=4 SV=1	0	2.07988	2.30769	1	1	1	1	520	58.153	5.4	High	Not Found		3500000		0.064	2.09565
			A6ZUS2	Methionyl-tRNA synthetase OS=Saccharomyces cerevisiae (strain YJM789) OX=307796 GN=MES1 PE=3 SV=1	0	2.07378	3.72836	2	2	1	1	751	85.594	6.61	High	Not Found		23000000		0.091	2.46341
			A0A0L8RP18	SXM1-like protein OS=Saccharomyces eubayanus OX=1080349 GN=DI49_0572 PE=4 SV=1	0	2.07002	1.27119	1	1	1	1	944	108.408	4.67	Not Found	High			72000000	0.054	3.35106
			E7KUK8	Rpn8p OS=Saccharomyces cerevisiae (strain Lalvin QA23) OX=764098 GN=QA23_4598 PE=4 SV=1	0	2.05144	5.01475	1	1	1	1	339	38.451	5.91	Not Found	High				0.116	2.85255
			A0A0L8RP89	Eukaryotic translation initiation factor 3 subunit G OS=Saccharomyces eubayanus OX=1080349 GN=TIF35 PE=3 SV=1	0	2.03687	4.36364	1	1	1	1	275	30.441	6.62	High	Not Found		43000000		0.145	2.2154
			P04789	Triosephosphate isomerase, glycosomal OS=Trypanosoma brucei brucei OX=5702 PE=1 SV=2	0	2.00231	6	1	1	1	1	250	26.818	8.97	Not Found	High			68000000	0.166	2.01624
			A0A0L8RIT4	THR1-like protein OS=Saccharomyces eubayanus OX=1080349 GN=DI49_2431 PE=3 SV=1	0	2.00078	3.64146	1	1	1	1	357	38.744	5.12	Not Found	High			3500000	0.136	1.77145
			C5DJ79	KLTH0F14190p OS=Lachancea thermotolerans (strain ATCC 56472 / CBS 6340 / NRRL Y-8284) OX=559295 GN=KLTH0F14190g PE=3 SV=1	0	1.95821	7.48299	1	2	1	1	147	16.277	10.73	High	High		85000000	74000000	0.259	4.33839
			A0A0L8RJX2	PNC1-like protein OS=Saccharomyces eubayanus OX=1080349 GN=DI49_1930 PE=4 SV=1	0	1.95311	5.55556	1	1	1	1	216	24.928	6.46	High	Not Found		7200000		0.166	1.92912
			E7KEY3	Def1p OS=Saccharomyces cerevisiae (strain AWRI796) OX=764097 GN=AWRI796_2906 PE=4 SV=1	0	1.94654	1.86667	1	1	1	1	750	85.399	5	Not Found	High			100000000	0.101	2.71208
			B5VTW2	YPR181Cp-like protein OS=Saccharomyces cerevisiae (strain AWRI1631) OX=545124 GN=AWRI1631_164260 PE=4 SV=1	0	1.94386	1.5625	1	1	1	1	768	85.359	5.73	High	Not Found		3800000		0.07	2.42648
			J7R5Z3	Uncharacterized protein OS=Kazachstania naganishii (strain ATCC MYA-139 / BCRC 22969 / CBS 8797 / CCRC 22969 / KCTC 17520 / NBRC 10181 / NCYC 3082) OX=1071383 GN=KNAG0E00120 PE=3 SV=1	0	1.92191	2.37691	1	1	1	1	589	64.019	7.72	High	Not Found		42000000		0.058	2.03388
			A0A250WLE5	Cofilin OS=Saccharomyces cerevisiae OX=4932 GN=COF1 PE=3 SV=1	0	1.87387	8.97436	1	1	1	1	156	17.555	5.68	High	Not Found				0.292	2.17932
			G8JR87	Uncharacterized protein OS=Eremothecium cymbalariae (strain CBS 270.75 / DBVPG 7215 / KCTC 17166 / NRRL Y-17582) OX=931890 GN=Ecym_3153 PE=3 SV=1	0	1.86455	2.40175	1	1	1	1	458	50.572	6.04	High	Not Found		3400000		0.101	1.77902
			P60546	Guanylate kinase OS=Escherichia coli (strain K12) GN=gmk PE=1 SV=1	0	1.85047	8.69565	1	1	1	1	207	23.578	6.54	High	Not Found		18000000		0.259	0
			J5RX05	ARO4-like protein OS=Saccharomyces kudriavzevii (strain ATCC MYA-4449 / AS 2.2408 / CBS 8840 / NBRC 1802 / NCYC 2889) OX=226230 GN=YBR249C PE=4 SV=1	0	1.84692	6.51685	2	2	2	1	445	48.792	8.35	Not Found	High			42000000	0.194	3.8127
			E7QCB6	Reticulon-like protein OS=Saccharomyces cerevisiae (strain Zymaflore VL3) OX=764100 GN=VL3_0585 PE=4 SV=1	0	1.84315	2.78481	1	1	1	1	395	44.574	9.29	High	Not Found		20000000		0.089	1.92256
			A0A0N8PZI9	Uncharacterized protein OS=Rhodotorula graminis (strain WP1) OX=578459 GN=RHOBADRAFT_46906 PE=4 SV=1	0	1.80799	3.28638	1	1	1	1	426	43.4	5.66	High	Not Found		180000000		0.166	2.74859
			E2GKZ7	Beta-1,3-glucan synthase regulatory subunit OS=Candida glabrata OX=5478 GN=RHO1 PE=4 SV=1	0	1.8066	4.7619	1	2	1	1	210	23.145	6.99	High	High		56000000	8500000	0.212	3.38867
			A0A1S7HV18	GCD7 (YLR291C) OS=Zygosaccharomyces parabailii OX=1365886 GN=ZPAR0K04160_B PE=3 SV=1	0	1.79942	2.6764	1	1	1	1	411	46.21	7.9	High	Not Found		10000000		0.116	1.85718
			C5DD77	KLTH0B08976p OS=Lachancea thermotolerans (strain ATCC 56472 / CBS 6340 / NRRL Y-8284) OX=559295 GN=KLTH0B08976g PE=3 SV=1	0	1.79206	4.26099	2	3	1	1	751	85.304	6.51	Not Found	High			7300000	0.094	5.11377
			D3UF30	Ssh1p OS=Saccharomyces cerevisiae (strain Lalvin EC1118 / Prise de mousse) OX=643680 GN=EC1118_1B15_4676g PE=3 SV=1	0	1.77885	2.85714	1	1	1	1	490	53.248	8.09	Not Found	High			5700000	0.105	1.88463
			A0A099P335	Succinate--CoA ligase [ADP-forming] subunit alpha, mitochondrial OS=Pichia kudriavzevii OX=4909 GN=JL09_g1545 PE=3 SV=1	0	1.77702	0.944767	1	1	1	1	1376	151.616	5.68	High	Not Found		1600000		0.032	2.07973
